# Supplementary material for: Changes in survival in de novo metastatic cancer in an era of new medicines
Source: PubMed Central journal article supplement — J Natl Cancer Inst. 2023 Mar 29;115(6):628–35. doi: 10.1093/jnci/djad020 (PMC10248844; doi:10.1093/jnci/djad020), 2023-03-29
Supplement: djad020_supplementary_data.pdf [file djad020_supplementary_data.pdf]

## Supplemental Materials

### Contents

|                                                                                                                                                                                                                                                       |           |
|-------------------------------------------------------------------------------------------------------------------------------------------------------------------------------------------------------------------------------------------------------|-----------|
| <b>Supplementary Table 1. Information used to classify patients as <i>de novo</i> metastatic disease</b>                                                                                                                                              | <b>2</b>  |
| <b>Supplementary Table 2. Definition of cancer types</b>                                                                                                                                                                                              | <b>3</b>  |
| <b>Supplementary Table 3. Number and proportion of patients with <i>de novo</i> metastatic cancer, per tumor, age group and period for cancers with limited numbers of patients in one or more age strata</b>                                         | <b>6</b>  |
| <b>Supplementary Table 4. Number of patients with M0 and M1 disease, per cancer type, per year</b>                                                                                                                                                    | <b>7</b>  |
| <b>Supplementary Table 5. Net survival per time period and changes over time for <i>de novo</i> metastatic cancer, per cancer type</b>                                                                                                                | <b>9</b>  |
| <b>Supplementary Table 6. Net survival for patients with <i>de novo</i> metastatic cancer, not standardized by age, per time period and change. For cancers with &lt; 10 patients in at least one of the age strata in 1989-1993 and/or 2014-2018</b> | <b>10</b> |
| <b>Supplementary Table 7. Survival of patients with <i>de novo</i> melanoma, a comparison of net survival and changes with and without unknown primary tumors in the analyses</b>                                                                     | <b>11</b> |
| <b>Supplementary Table 8. Median survival (months) of patients diagnosed in 1989-1993 and in 2014-2018, per cancer type</b>                                                                                                                           | <b>12</b> |
| <b>Supplementary Table 9. Search methods to identify cancer medicines introduced in the Netherlands and the year of introduction for the different types of cancers</b>                                                                               | <b>13</b> |
| <b>Supplementary Table 10. Novel medicines and extensions of indications per metastatic cancer, for the metastatic cancer types included in our study, year of introduction, source of approval year</b>                                              | <b>15</b> |
| <b>Supplementary Table 11. Initial systemic therapies of patients with GIST and breast cancer, obtained from the Netherlands Cancer Registry</b>                                                                                                      | <b>22</b> |
| <b>Supplementary Figure 1. Changes in <i>de novo</i> metastatic cancer survival over time, per cancer type, 1-year and 5-year</b>                                                                                                                     | <b>23</b> |

### Supplementary Table 1. Information used to classify patients as *de novo* metastatic disease

|                                   | <b>1989-93 N (%)</b> | <b>2014-18 N (%)</b> |
|-----------------------------------|----------------------|----------------------|
| TNM stage                         | 35873 (69%)          | 77513 (92%)          |
| EoD stage                         | 4062 (8%)            | 608 (1%)             |
| Primary site unknown <sup>a</sup> | 12210 (23%)          | 6253 (7%)            |
| Other                             | 118 (0%)             | 9 (0%)               |

<sup>a</sup>Does not correspond to the numbers in table 1 because pts with melanoma/NETs/GIST also included

Abbreviations: EoD: Extent of disease classification, TNM: tumor node metastases classification, N:All patients (M0+M1), excluding SCC

**Supplementary Table 2. Definition of cancer types**

| Tumor             | Description                                                                                                                                                                                                    | Details                 | Topography codes <sup>a</sup>                                                                                                                                          | Morphology                                                                         | Weight group <sup>1,2</sup> |
|-------------------|----------------------------------------------------------------------------------------------------------------------------------------------------------------------------------------------------------------|-------------------------|------------------------------------------------------------------------------------------------------------------------------------------------------------------------|------------------------------------------------------------------------------------|-----------------------------|
| HNSCC             | Lip, Tongue, Gum, Floor of mouth, Palate, Other unspecified parts of mouth, Tonsil, Oropharynx, Nasopharynx, Pyriform Sinus, Hypopharynx, Other and ill- defines sites in lip, oral cavity and pharynx, larynx | Squamous cell carcinoma | C0.03-0.05, C01.0-01.9, C02.0-02.9, C03.0-03.9, C04.0-04.9, C05.0-05.9, C06.0-06.9, C09.0-09.9, C10.0-10.9, C11.0-11.9, C12.0-12.9, C13.0-13.9, C14.0-14.9, C32.0-32.9 | 8050-8089                                                                          | 1                           |
| Esophagus, Cardia | Esophagus, Cardia NOS                                                                                                                                                                                          | Only carcinoma          | C15.0-15.9, C16.0                                                                                                                                                      | 8000-8576, 8940-8950, 8980-8983<br><br>Excluding NETs                              |                             |
| Stomach           | Stomach                                                                                                                                                                                                        | Only carcinoma          | C16.1-C16.9                                                                                                                                                            |                                                                                    | 1                           |
| Colon             | Colon                                                                                                                                                                                                          | Only carcinoma          | C18.0-18.9                                                                                                                                                             |                                                                                    | 1                           |
| Rectum            | Rectosigmoid junction, Rectum                                                                                                                                                                                  | Only carcinoma          | C19.9, C20.9                                                                                                                                                           |                                                                                    | 1                           |
| Hepatocellular    | Hepatocellular carcinoma                                                                                                                                                                                       |                         | C22.0                                                                                                                                                                  | 8000-8012, 8014-8040, 8046-8148, 8160-8231, 8250-8573, 8575-8576, 8980, 8982, 9110 | 1                           |
| Gallbladder       | Gallbladder                                                                                                                                                                                                    | Only carcinoma          | C23.9                                                                                                                                                                  | 8000-8576, 8940-8950, 8980-8983                                                    | 1                           |
| Bile Ducts        | Intrahepatic bile duct, other and unspecified parts of biliary tract, biliary tract NOS                                                                                                                        | Only carcinoma          | C22.1, C24.0-24.9                                                                                                                                                      | 8000-8576, 8940-8950, 8980-8983<br>Excluding NETs                                  | 1                           |
| Pancreas          | Pancreas                                                                                                                                                                                                       | Only carcinoma          |                                                                                                                                                                        |                                                                                    | 1                           |
| GIST              |                                                                                                                                                                                                                |                         | <u>Before 2001</u><br>C15.0-C260<br>C48.2<br>C76.2<br><u>Whole time period</u><br>C150-C26.9,<br>C48.1-48.2<br>C49.4<br>C76.2                                          | 8890- 8896<br><br>8936<br>(since 2000 ICD-0-3 has morphology code 8936/3 for GIST) | 1                           |
| GEP NET           | NET of the appendix                                                                                                                                                                                            |                         | C18.1                                                                                                                                                                  | 8240-8242, 8248-8249                                                               | 1                           |
|                   | NET of the stomach                                                                                                                                                                                             |                         | C16.0-16.9                                                                                                                                                             | 8240-8242, 8248-8249, 8150-8153, 8155-8156                                         |                             |
|                   | NET of the small intestine                                                                                                                                                                                     |                         | C17.1-17.9                                                                                                                                                             | 8240-8242, 8248-8249, 8150-8153, 8155-8156                                         |                             |
|                   | NET of the colon                                                                                                                                                                                               |                         | C18.0, C18.2-18.9, C19.9, C20.9                                                                                                                                        | 8240-8242, 8248-8249                                                               |                             |
|                   | Gastrointestinal NET other                                                                                                                                                                                     |                         | C15.0-15.9, C26.0-26.9, C48.0-48.9                                                                                                                                     | 8240-8242, 8248-8249, 8150-8153, 8155-8156                                         |                             |

|                                      |                                                                                                                                                                                                                                                                                                          |                                                                              |                                                              |                                                                                                                                                            |   |
|--------------------------------------|----------------------------------------------------------------------------------------------------------------------------------------------------------------------------------------------------------------------------------------------------------------------------------------------------------|------------------------------------------------------------------------------|--------------------------------------------------------------|------------------------------------------------------------------------------------------------------------------------------------------------------------|---|
|                                      | NET of the pancreas                                                                                                                                                                                                                                                                                      |                                                                              | C25.0-25.9                                                   | 8240-8242, 8248-8249, 8150-8153, 8155-8157                                                                                                                 |   |
|                                      | NET van duodenum/ampulla of Vater                                                                                                                                                                                                                                                                        |                                                                              | C17.0, C24.1                                                 | 8240-8242, 8248-8249, 8150-8153, 8155-8156                                                                                                                 |   |
|                                      | NET with unknown primary location                                                                                                                                                                                                                                                                        |                                                                              | C80.9                                                        | 8240-8242, 8248-8249, 8150-8153, 8155-8156                                                                                                                 |   |
| NSCLC                                | NSCLC                                                                                                                                                                                                                                                                                                    |                                                                              | C34.0-34.9                                                   | 8010-8020, 8022-8035, 8046-8230, 8243-8246, 8250-8576, 8972, 8980-8983                                                                                     | 1 |
| SCLC                                 | SCLC                                                                                                                                                                                                                                                                                                     |                                                                              | C34.0-34.9                                                   | 8041-8045, 8002, 8021                                                                                                                                      | 1 |
| Lung other                           | Trachea carcinoma &<br><br>other and unspecified cancers of the lung and trachea<br><br>Carcinoid of the lung                                                                                                                                                                                            |                                                                              | C33.9<br><br>C33.9 / C34.0-34.9<br><br>C34.0-34.9            | 8000-8576, 8940-8950, 8980-8983, 9872<br><br>8000-8001, 8003-8005, 8720-8790<br><br>8240-8242, 8248-8249                                                   | 1 |
| Melanoma                             | Melanoma of the lip, skin, vulva, penis, scrotum NOS, unknown primary                                                                                                                                                                                                                                    | Melanoma                                                                     | C00.1-00.2, C44.0-44.9, C51.0-51.9, C60.0-60.9, C63.2, C89.0 | 8720-8790                                                                                                                                                  | 2 |
| Sarcoma of the bone and soft tissues | Sarcoma of the soft tissues and viscera <sup>b</sup><br><br>Note: C70.0-70.9 & C71.0-71.9 (brain), C72.0-72.9 (spinal cord, cranial nerves, and other parts of central nervous system) , C75.1 & C75.3 (pituitary and pineal gland) excluded from analyses<br><br>Bones, joints, and articular cartilage |                                                                              | C00-C39, C42, C44, C47-C52, C58-C70, C72-C80<br><br>C49      | 8710-8714, 8800-8830, 8833-8850, 8852-8921, 8935, 8963, 8990-8991, 9040-9045, 9120-9137, 9141-9221, 9230-9342, 9364-9373, 9540-9582<br><br>8000-8005, 8982 | 2 |
|                                      |                                                                                                                                                                                                                                                                                                          |                                                                              | C40.0-40.9, C41.0-41.9                                       | 8000-8005, 8710-8714, 8800-8830, 8833-8850, 8852-8921, 8990-8991, 9040-9045, 9120-9137, 9141-9221, 9230-9342, 9364-9373, 9540-9582, 8935, 8963             |   |
| Breast                               | Breast                                                                                                                                                                                                                                                                                                   | Only carcinoma                                                               | C50.0-50.9                                                   | 8000-8576, 8940-8950, 8980-8983, 9110                                                                                                                      | 1 |
| Vulva/Vagina                         | Vulva/ Vagina                                                                                                                                                                                                                                                                                            | SCC / BCC / Merkle cell carcinoma / cutaneous adnexal carcinoma of the vulva | C51.0-51.9                                                   | 8000-8576, 8940-8950, 8980-8983, 9110                                                                                                                      | 1 |
|                                      |                                                                                                                                                                                                                                                                                                          |                                                                              | C52.9                                                        | 8000-8576, 8940-8950, 8980-8983, 9110                                                                                                                      |   |

|                            |                                                                                                                                  |                       |                                                        |                                                                                                                                                                                                                                                         |   |
|----------------------------|----------------------------------------------------------------------------------------------------------------------------------|-----------------------|--------------------------------------------------------|---------------------------------------------------------------------------------------------------------------------------------------------------------------------------------------------------------------------------------------------------------|---|
|                            |                                                                                                                                  | Vaginal carcinoma     |                                                        |                                                                                                                                                                                                                                                         |   |
| Cervix Uteri               | Cervix Uteri carcinoma                                                                                                           | Only carcinoma        | C53.0-53.9                                             | 8000-8576, 8940-8951,                                                                                                                                                                                                                                   | 2 |
| Corpus Uteri - endometrium | Corpus uteri, Uterus NOS                                                                                                         | Endometrium carcinoma | C54.0-54.9, C55.9                                      | 8980-8983, 9110                                                                                                                                                                                                                                         | 1 |
| Ovary                      | Epithelial ovarian carcinoma,<br><br>Extra-ovarian carcinoma<br><br>Tubal carcinoma                                              | Ovary                 | C56.0-56.9<br><br>C48.1-48.2<br><br>C57.0              | 8000-8239, 8250-8441, 8450, 8452-8461, 8470-8471, 8474, 8480-8576, 8930-8934, 8950-8951, 8980, 8982, 9000-9015, 9110<br><br>8000-8046, 8260-8576, 8950-8951, 8140, 8255, 8980, 9110<br><br>8000-8576, 8930-8934, 8950-8951, 9000-9015, 8980, 8982, 9110 | 1 |
| Prostate                   | Prostate                                                                                                                         | Only carcinoma        | C61.9                                                  | 8000-8084, 8140-8576, 8940-8950, 8980-8983, 9110                                                                                                                                                                                                        | 4 |
| Testicular                 | Testicular                                                                                                                       | Only germ cell tumors | C62.0-62.9                                             | 8000-8005, 9060-9102                                                                                                                                                                                                                                    | 3 |
| Kidney                     | Kidney carcinoma                                                                                                                 | Only carcinoma        | C64.0-64.9                                             | 8000-8084, 8140-8576, 8940-8950, 8980-8983, 9110                                                                                                                                                                                                        | 1 |
| Bladder                    | Bladder, Renal pelvis, Ureter, Other and unspecified urinary organs                                                              | Only carcinoma        | C67.0-67.9, C65.9, C66.9, C68.0-68.9<br><br>C64.0-64.9 | 8000-8576, 8940-8950, 8980-8983, 9110,<br><br>8120-8131                                                                                                                                                                                                 | 1 |
| Thyroid                    | Thyroid Gland includes papillary and follicular, medullary, anaplastic, SCC of the thyroid, other and unspecified thyroid tumors | Only carcinoma        | C73.9                                                  | 8000-8576, 8588, 8589, 8940-8950, 8980-8983                                                                                                                                                                                                             | 2 |
| Unknown                    | Unknown primary site                                                                                                             |                       | C80.9                                                  | Excluding GIST/NET/melanomas specified above                                                                                                                                                                                                            | 1 |

Abbreviations: BCC: Basal cell carcinoma; GEP NET: Gastroenteropancreatic neuroendocrine tumor; GIST: Gastrointestinal stromal tumors; HNSCC: Head and neck squamous cell carcinoma; NET: neuroendocrine tumors ; NSCLC: Non-small cell lung cancer; NOS: Not other specified; SCC: Squamous cell carcinoma; SCLC: Small cell lung cancer:

aThe International Classification of Diseases for Oncology (ICD-O) is applied for coding topography and morphology.<sup>3</sup> The stage is coded according to the Union for International Cancer Control (UICC) tumor, node, metastasis (TNM) classification, using the edition valid at the point of diagnosis a certain time period (4th–8th edition).<sup>4</sup>

bFor certain sarcomas the morphology codes slightly differed.

Weight group 1: 18-44 year: 7%; 45-54 year: 12%; 55-64 year: 23%; 65-74 year: 29%; 75 year and older: 29%

Weight group 2: 18-44 year: 28%; 45-54 year: 17%; 55-64 year: 21%; 65-74 year: 20%; 75 year and older: 14%

Weight group 3: 18-44 year: 60%; 45-54 year: 10%; 55-64 year: 10%; 65-74 year: 10%; 75 year and older: 10%

Weight group 4: 18-54 year: 4%; 55-64 year: 20%; 65-74 year: 40%; 75-84 year: 30% 85 year and older: 6%

**Supplementary Table 3. Number and proportion of patients with de novo metastatic cancer, per tumor, age group and period for cancers with limited numbers of patients in one or more age strata**

|                |       | 1989-93 |     | 2014-2018 |     |
|----------------|-------|---------|-----|-----------|-----|
|                |       | N       | %   | N         | %   |
| HNSCC          | 18-44 | 7       | 7%  | 4         | 2%  |
|                | 45-54 | 19      | 20% | 23        | 10% |
|                | 55-64 | 30      | 31% | 78        | 33% |
|                | 65-74 | 26      | 27% | 96        | 40% |
|                | 75+   | 15      | 15% | 37        | 16% |
| Hepatocellular | 18-44 | 15      | 13% | 15        | 3%  |
|                | 45-54 | 15      | 13% | 33        | 6%  |
|                | 55-64 | 20      | 17% | 117       | 23% |
|                | 65-74 | 47      | 41% | 198       | 39% |
|                | 75+   | 18      | 16% | 145       | 29% |
| Gallbladder    | 18-44 | 8       | 2%  | 6         | 2%  |
|                | 45-54 | 21      | 6%  | 23        | 6%  |
|                | 55-64 | 57      | 17% | 77        | 22% |
|                | 65-74 | 115     | 34% | 136       | 48% |
|                | 75+   | 139     | 41% | 141       | 85% |
| GIST           | 18-44 | 5       | 10% | 5         | 3%  |
|                | 45-54 | 14      | 28% | 19        | 12% |
|                | 55-64 | 10      | 20% | 44        | 28% |
|                | 65-74 | 16      | 32% | 57        | 36% |
|                | 75+   | 5       | 10% | 35        | 22% |
| Lung other     | 18-44 | 15      | 1%  | 7         | 0%  |
|                | 45-54 | 62      | 6%  | 73        | 3%  |
|                | 55-64 | 216     | 21% | 325       | 11% |
|                | 65-74 | 360     | 34% | 787       | 27% |
|                | 75+   | 392     | 38% | 1698      | 59% |
| Vulva/vagina   | 18-44 | 2       | 7%  | 2         | 2%  |
|                | 45-54 | 4       | 15% | 10        | 12% |
|                | 55-64 | 2       | 7%  | 7         | 8%  |
|                | 65-74 | 2       | 7%  | 28        | 33% |
|                | 75+   | 17      | 63% | 38        | 45% |
| Corpus Uteri   | 18-44 | 2       | 1%  | 8         | 1%  |
|                | 45-54 | 19      | 8%  | 42        | 6%  |
|                | 55-64 | 62      | 25% | 134       | 20% |
|                | 65-74 | 90      | 36% | 259       | 39% |
|                | 75+   | 75      | 30% | 229       | 34% |
| Testis         | 18-44 | 184     | 88% | 238       | 81% |
|                | 45-54 | 17      | 8%  | 41        | 14% |
|                | 55-64 | 5       | 2%  | 9         | 3%  |
|                | 65-74 | 3       | 1%  | 5         | 2%  |
|                | 75+   | 1       | 0%  | 0         | 0%  |

Abbreviations: HNSCC: head and neck squamous cell carcinoma; GIST: Gastrointestinal stromal tumors; N: sample size.

**Supplementary Table 4. Number of patients with M0 and M1 disease, per cancer type, per year**

| Cancer Type              | Year | 1989 | 1990 | 1991 | 1992 | 1993 | 1994 | 1995 | 1996 | 1997 | 1998 | 1999 | 2000 | 2001 | 2002 | 2003 | 2004 | 2005 | 2006 | 2007 | 2008 | 2009 | 2010 | 2011 | 2012 | 2013 | 2014 | 2015 | 2016 | 2017 | 2018 |
|--------------------------|------|------|------|------|------|------|------|------|------|------|------|------|------|------|------|------|------|------|------|------|------|------|------|------|------|------|------|------|------|------|------|
| <b>HNSCC</b>             | M0   | 1315 | 1397 | 1350 | 1454 | 1388 | 1449 | 1490 | 1507 | 1558 | 1483 | 1553 | 1591 | 1562 | 1587 | 1671 | 1713 | 1721 | 1678 | 1635 | 1794 | 1847 | 1826 | 1951 | 1895 | 1839 | 1942 | 1883 | 1980 | 1921 | 1944 |
|                          | M1   | 18   | 16   | 14   | 27   | 22   | 18   | 14   | 27   | 26   | 26   | 25   | 28   | 22   | 39   | 33   | 24   | 37   | 41   | 36   | 37   | 53   | 48   | 31   | 50   | 59   | 35   | 53   | 54   | 49   | 47   |
| <b>Esophagus/ardia</b>   | M0   | 830  | 942  | 964  | 926  | 985  | 1000 | 1028 | 1001 | 994  | 1109 | 1078 | 1038 | 1021 | 1142 | 1159 | 1140 | 1069 | 1064 | 1077 | 1195 | 1251 | 1327 | 1424 | 1355 | 1321 | 1370 | 1470 | 1498 | 1496 | 1505 |
|                          | M1   | 264  | 308  | 345  | 357  | 372  | 403  | 397  | 416  | 433  | 427  | 476  | 486  | 520  | 558  | 613  | 667  | 717  | 806  | 770  | 866  | 873  | 816  | 757  | 781  | 807  | 847  | 882  | 874  | 861  | 923  |
| <b>Stomach</b>           | M0   | 1323 | 1224 | 1283 | 1188 | 1123 | 1073 | 1015 | 974  | 939  | 920  | 915  | 885  | 796  | 888  | 830  | 794  | 755  | 713  | 690  | 698  | 653  | 646  | 658  | 617  | 598  | 589  | 493  | 536  | 432  | 454  |
|                          | M1   | 578  | 545  | 553  | 538  | 506  | 524  | 491  | 462  | 432  | 444  | 462  | 424  | 451  | 428  | 403  | 452  | 416  | 396  | 417  | 470  | 466  | 481  | 457  | 469  | 439  | 425  | 430  | 436  | 411  | 446  |
| <b>Colon</b>             | M0   | 3351 | 3414 | 3492 | 3633 | 3604 | 3675 | 3637 | 3895 | 3920 | 3895 | 4037 | 4203 | 4084 | 4125 | 4325 | 4601 | 4646 | 4817 | 4936 | 5249 | 5365 | 5438 | 5705 | 5696 | 5511 | 6855 | 7410 | 7169 | 6467 | 6250 |
|                          | M1   | 851  | 920  | 981  | 990  | 1011 | 1026 | 995  | 980  | 1057 | 1079 | 1167 | 1116 | 1192 | 1246 | 1349 | 1441 | 1520 | 1554 | 1670 | 1789 | 1770 | 1975 | 1938 | 1964 | 2016 | 2004 | 1955 | 1906 | 1733 | 1734 |
| <b>Rectum</b>            | M0   | 2043 | 1915 | 1990 | 2127 | 2131 | 2089 | 2219 | 2148 | 2316 | 2206 | 2329 | 2351 | 2342 | 2532 | 2532 | 2655 | 2646 | 2746 | 2888 | 2765 | 2708 | 2793 | 2902 | 2858 | 2709 | 3274 | 3446 | 3253 | 3305 | 3218 |
|                          | M1   | 369  | 355  | 421  | 402  | 409  | 413  | 416  | 444  | 437  | 506  | 488  | 486  | 562  | 548  | 646  | 648  | 658  | 673  | 739  | 717  | 767  | 716  | 815  | 699  | 760  | 770  | 773  | 736  | 711  | 654  |
| <b>Hepatocellular ar</b> | M0   | 123  | 114  | 121  | 137  | 166  | 159  | 140  | 162  | 164  | 170  | 168  | 135  | 198  | 187  | 202  | 188  | 200  | 191  | 237  | 247  | 287  | 291  | 293  | 312  | 330  | 379  | 393  | 385  | 450  | 494  |
|                          | M1   | 22   | 25   | 20   | 24   | 23   | 29   | 23   | 25   | 33   | 21   | 28   | 34   | 31   | 41   | 36   | 47   | 53   | 44   | 47   | 74   | 64   | 71   | 76   | 66   | 91   | 67   | 104  | 105  | 122  | 110  |
| <b>Gallbladder</b>       | M0   | 202  | 180  | 161  | 150  | 155  | 166  | 135  | 123  | 115  | 114  | 100  | 98   | 80   | 84   | 70   | 62   | 84   | 75   | 72   | 78   | 83   | 78   | 85   | 85   | 73   | 69   | 71   | 63   | 55   | 74   |
|                          | M1   | 68   | 74   | 80   | 60   | 57   | 60   | 57   | 53   | 70   | 51   | 47   | 57   | 45   | 50   | 47   | 40   | 28   | 49   | 55   | 64   | 72   | 52   | 75   | 60   | 55   | 70   | 75   | 80   | 73   | 85   |
| <b>Bile ducts</b>        | M0   | 307  | 289  | 288  | 300  | 302  | 317  | 293  | 308  | 292  | 294  | 301  | 320  | 318  | 277  | 316  | 309  | 324  | 335  | 381  | 324  | 398  | 334  | 394  | 401  | 415  | 479  | 459  | 450  | 494  | 470  |
|                          | M1   | 51   | 49   | 57   | 62   | 70   | 69   | 61   | 59   | 64   | 79   | 61   | 86   | 81   | 71   | 104  | 98   | 95   | 117  | 144  | 124  | 141  | 145  | 161  | 227  | 220  | 248  | 261  | 269  | 296  | 273  |
| <b>Pancreas</b>          | M0   | 769  | 778  | 736  | 729  | 685  | 703  | 730  | 674  | 690  | 731  | 705  | 750  | 677  | 719  | 680  | 669  | 759  | 719  | 772  | 775  | 764  | 831  | 806  | 825  | 829  | 867  | 878  | 864  | 908  | 899  |
|                          | M1   | 445  | 450  | 496  | 492  | 488  | 466  | 531  | 526  | 503  | 571  | 545  | 584  | 580  | 593  | 630  | 750  | 800  | 761  | 828  | 978  | 1004 | 1047 | 999  | 1054 | 1080 | 1172 | 1184 | 1305 | 1283 | 1279 |
| <b>GIST</b>              | M0   | 32   | 42   | 28   | 35   | 32   | 47   | 48   | 47   | 55   | 57   | 58   | 70   | 69   | 71   | 70   | 108  | 102  | 115  | 112  | 108  | 102  | 123  | 126  | 133  | 113  | 126  | 136  | 115  | 134  | 139  |
|                          | M1   | 6    | 4    | 11   | 16   | 13   | 11   | 3    | 12   | 13   | 11   | 11   | 16   | 19   | 13   | 19   | 21   | 26   | 19   | 20   | 27   | 27   | 19   | 25   | 23   | 29   | 34   | 31   | 41   | 32   | 22   |
| <b>NET</b>               | M0   | 78   | 151  | 116  | 133  | 125  | 138  | 148  | 131  | 151  | 165  | 150  | 163  | 148  | 137  | 164  | 149  | 203  | 176  | 224  | 198  | 257  | 271  | 315  | 328  | 319  | 330  | 339  | 348  | 357  | 385  |
|                          | M1   | 57   | 60   | 61   | 62   | 64   | 66   | 78   | 65   | 83   | 96   | 72   | 84   | 84   | 84   | 105  | 91   | 90   | 118  | 99   | 110  | 119  | 144  | 155  | 163  | 135  | 154  | 167  | 167  | 173  | 179  |
| <b>NSCLC</b>             | M0   | 4365 | 4345 | 4397 | 4353 | 4367 | 4249 | 4419 | 4318 | 4198 | 4070 | 3855 | 3809 | 3642 | 3633 | 3629 | 3646 | 3584 | 3645 | 3698 | 3691 | 3652 | 3584 | 3709 | 3471 | 3607 | 3455 | 3595 | 3511 | 3446 | 3649 |
|                          | M1   | 1425 | 1457 | 1526 | 1551 | 1551 | 1547 | 1553 | 1592 | 1711 | 1827 | 1909 | 2049 | 2142 | 2343 | 2420 | 2688 | 2810 | 3012 | 3080 | 3282 | 3356 | 3694 | 3764 | 3751 | 3858 | 3887 | 4020 | 3890 | 3951 | 4120 |
| <b>SCLC</b>              | M0   | 851  | 900  | 831  | 835  | 822  | 803  | 738  | 772  | 741  | 775  | 683  | 657  | 614  | 582  | 612  | 619  | 512  | 542  | 544  | 532  | 521  | 449  | 496  | 465  | 437  | 445  | 449  | 416  | 403  | 387  |
|                          | M1   | 657  | 725  | 761  | 706  | 726  | 723  | 660  | 642  | 651  | 635  | 721  | 700  | 705  | 759  | 767  | 823  | 866  | 982  | 920  | 963  | 938  | 1070 | 1047 | 994  | 967  | 1000 | 987  | 978  | 995  | 913  |
| <b>Lung other</b>        | M0   | 412  | 384  | 428  | 465  | 404  | 437  | 421  | 439  | 460  | 443  | 401  | 429  | 371  | 431  | 454  | 452  | 441  | 496  | 529  | 543  | 601  | 595  | 680  | 690  | 781  | 784  | 1030 | 1081 | 1151 | 1219 |
|                          | M1   | 190  | 189  | 229  | 238  | 199  | 228  | 235  | 198  | 219  | 252  | 280  | 274  | 295  | 331  | 361  | 356  | 366  | 353  | 354  | 402  | 416  | 417  | 438  | 436  | 487  | 428  | 554  | 650  | 597  | 661  |
| <b>Melanoma</b>          | M0   | 1541 | 1402 | 1454 | 1578 | 1489 | 1821 | 1786 | 1913 | 2102 | 2011 | 2162 | 2234 | 2530 | 2506 | 2706 | 2917 | 3157 | 3195 | 3369 | 3682 | 3855 | 4104 | 4454 | 4597 | 4797 | 4847 | 5036 | 5581 | 5180 | 5572 |
|                          | M1   | 103  | 92   | 88   | 77   | 80   | 93   | 85   | 92   | 115  | 105  | 105  | 126  | 124  | 136  | 136  | 129  | 153  | 150  | 155  | 154  | 177  | 184  | 190  | 181  | 172  | 194  | 205  | 225  | 204  | 213  |
| <b>Sarcoma</b>           | M0   | 494  | 451  | 463  | 471  | 458  | 490  | 437  | 483  | 474  | 453  | 463  | 473  | 465  | 473  | 494  | 461  | 497  | 498  | 500  | 481  | 454  | 478  | 513  | 568  | 486  | 556  | 539  | 564  | 540  | 568  |
|                          | M1   | 83   | 68   | 70   | 88   | 81   | 95   | 89   | 90   | 86   | 82   | 96   | 102  | 90   | 93   | 97   | 95   | 95   | 92   | 105  | 90   | 118  | 112  | 107  | 136  | 92   | 112  | 112  | 118  | 98   | 105  |

|                      |    |      |      |      |      |      |      |      |      |      |      |       |       |       |       |       |       |       |       |       |       |       |       |       |       |       |       |       |       |       |       |
|----------------------|----|------|------|------|------|------|------|------|------|------|------|-------|-------|-------|-------|-------|-------|-------|-------|-------|-------|-------|-------|-------|-------|-------|-------|-------|-------|-------|-------|
| <b>Breast</b>        | M0 | 7022 | 7472 | 7823 | 8468 | 8762 | 9121 | 8715 | 8987 | 9053 | 9328 | 10189 | 10281 | 10638 | 10538 | 10738 | 10957 | 10947 | 11289 | 11733 | 11808 | 11928 | 12129 | 12666 | 12845 | 12806 | 12902 | 12875 | 12933 | 13149 | 12872 |
|                      | M1 | 528  | 575  | 575  | 563  | 567  | 555  | 516  | 535  | 539  | 566  | 560   | 553   | 575   | 591   | 528   | 593   | 591   | 600   | 535   | 632   | 639   | 562   | 582   | 664   | 727   | 731   | 756   | 780   | 754   | 805   |
| <b>Vulva/Vagina</b>  | M0 | 224  | 219  | 231  | 225  | 202  | 226  | 212  | 253  | 203  | 240  | 237   | 225   | 230   | 231   | 264   | 245   | 256   | 268   | 300   | 272   | 334   | 317   | 367   | 347   | 315   | 370   | 338   | 372   | 377   | 390   |
|                      | M1 | 5    | 6    | 6    | 3    | 7    | 6    | 5    | 5    | 5    | 11   | 11    | 6     | 6     | 9     | 5     | 7     | 13    | 9     | 15    | 17    | 15    | 14    | 19    | 9     | 14    | 17    | 17    | 20    | 9     | 22    |
| <b>Cervix Uteri</b>  | M0 | 685  | 729  | 685  | 694  | 674  | 662  | 671  | 663  | 667  | 695  | 654   | 615   | 544   | 597   | 545   | 613   | 611   | 607   | 657   | 610   | 626   | 646   | 627   | 623   | 568   | 617   | 582   | 679   | 666   | 724   |
|                      | M1 | 26   | 25   | 26   | 38   | 29   | 31   | 37   | 34   | 37   | 32   | 29    | 43    | 36    | 33    | 45    | 49    | 47    | 44    | 57    | 59    | 65    | 53    | 71    | 61    | 57    | 81    | 86    | 83    | 58    | 65    |
| <b>Corpus Uteri</b>  | M0 | 1138 | 1063 | 1130 | 1146 | 1079 | 1176 | 1154 | 1180 | 1248 | 1272 | 1234  | 1241  | 1284  | 1287  | 1358  | 1473  | 1496  | 1345  | 1438  | 1552  | 1459  | 1531  | 1518  | 1481  | 1532  | 1505  | 1491  | 1487  | 1593  | 1514  |
|                      | M1 | 45   | 52   | 54   | 43   | 54   | 40   | 45   | 39   | 47   | 46   | 50    | 49    | 58    | 58    | 52    | 68    | 65    | 80    | 82    | 92    | 98    | 89    | 103   | 107   | 127   | 125   | 139   | 128   | 138   | 142   |
| <b>Ovary</b>         | M0 | 883  | 882  | 976  | 976  | 954  | 950  | 1003 | 939  | 937  | 968  | 944   | 876   | 858   | 868   | 834   | 860   | 807   | 825   | 846   | 872   | 864   | 926   | 870   | 860   | 822   | 809   | 835   | 800   | 842   | 848   |
|                      | M1 | 203  | 218  | 218  | 208  | 213  | 183  | 192  | 201  | 196  | 192  | 167   | 178   | 222   | 213   | 210   | 256   | 222   | 228   | 284   | 248   | 257   | 295   | 243   | 252   | 282   | 286   | 285   | 313   | 297   | 336   |
| <b>Prostate</b>      | M0 | 2808 | 2914 | 3057 | 3407 | 3860 | 4707 | 5000 | 5061 | 4980 | 5171 | 5259  | 5434  | 5516  | 5915  | 6630  | 7600  | 7172  | 7858  | 7917  | 7880  | 8308  | 8456  | 9291  | 9062  | 8728  | 7718  | 7990  | 8506  | 8710  | 8971  |
|                      | M1 | 1077 | 1016 | 1023 | 1192 | 1169 | 1154 | 1092 | 1052 | 989  | 1012 | 928   | 1010  | 1014  | 986   | 1082  | 1143  | 1120  | 1108  | 1137  | 1159  | 1296  | 1298  | 1343  | 1267  | 1309  | 1364  | 1569  | 1599  | 1821  | 2138  |
| <b>Testicular</b>    | M0 | 284  | 280  | 286  | 305  | 347  | 335  | 341  | 387  | 362  | 401  | 431   | 430   | 508   | 453   | 461   | 516   | 503   | 536   | 528   | 609   | 582   | 599   | 628   | 670   | 645   | 693   | 637   | 742   | 725   | 755   |
|                      | M1 | 42   | 45   | 34   | 44   | 45   | 46   | 46   | 62   | 46   | 66   | 56    | 48    | 53    | 61    | 66    | 44    | 67    | 63    | 59    | 63    | 64    | 50    | 70    | 49    | 50    | 53    | 54    | 61    | 63    | 62    |
| <b>Kidney</b>        | M0 | 842  | 826  | 802  | 906  | 886  | 883  | 835  | 908  | 908  | 894  | 848   | 878   | 937   | 922   | 989   | 1041  | 1004  | 1163  | 1294  | 1251  | 1351  | 1312  | 1419  | 1412  | 1455  | 1418  | 1493  | 1691  | 1628  | 1724  |
|                      | M1 | 269  | 298  | 301  | 319  | 302  | 314  | 344  | 331  | 330  | 308  | 375   | 348   | 324   | 363   | 374   | 366   | 405   | 447   | 439   | 417   | 459   | 473   | 433   | 464   | 430   | 443   | 446   | 463   | 421   | 432   |
| <b>Bladder</b>       | M0 | 2019 | 1978 | 2035 | 2061 | 1991 | 2102 | 2075 | 2099 | 2088 | 2044 | 2184  | 2143  | 2146  | 2169  | 2189  | 2192  | 2354  | 2328  | 2421  | 2539  | 2456  | 2526  | 2452  | 2500  | 2459  | 2512  | 2486  | 2631  | 2659  | 2549  |
|                      | M1 | 97   | 91   | 125  | 122  | 114  | 111  | 123  | 125  | 119  | 130  | 148   | 149   | 157   | 182   | 181   | 196   | 205   | 233   | 231   | 231   | 233   | 269   | 290   | 296   | 317   | 305   | 321   | 361   | 381   | 400   |
| <b>Thyroid Gland</b> | M0 | 256  | 283  | 246  | 241  | 254  | 262  | 276  | 240  | 272  | 295  | 296   | 289   | 286   | 327   | 312   | 340   | 358   | 339   | 378   | 412   | 417   | 444   | 482   | 508   | 548   | 554   | 533   | 528   | 562   | 582   |
|                      | M1 | 34   | 39   | 33   | 37   | 39   | 27   | 30   | 29   | 26   | 31   | 39    | 29    | 32    | 36    | 33    | 36    | 45    | 45    | 37    | 47    | 44    | 43    | 35    | 44    | 40    | 48    | 50    | 60    | 43    | 58    |
| <b>Other</b>         | M0 | 34   | 39   | 33   | 37   | 39   | 27   | 30   | 29   | 26   | 31   | 39    | 29    | 32    | 36    | 33    | 36    | 45    | 45    | 37    | 47    | 44    | 43    | 35    | 44    | 40    | 48    | 50    | 60    | 43    | 58    |
|                      | M1 | 905  | 977  | 896  | 931  | 926  | 948  | 947  | 1060 | 1041 | 1133 | 1087  | 1099  | 1098  | 1038  | 1059  | 1159  | 1171  | 1123  | 1203  | 1287  | 1271  | 1286  | 1326  | 1301  | 1289  | 1288  | 1323  | 1337  | 1354  | 1444  |
| <b>Unknown</b>       | M1 | 2219 | 2373 | 2308 | 2421 | 2338 | 2343 | 2469 | 2341 | 2402 | 2458 | 2458  | 2379  | 2498  | 2438  | 2288  | 2282  | 2167  | 1970  | 1808  | 1816  | 1610  | 1559  | 1533  | 1388  | 1337  | 1042  | 989   | 1106  | 1044  | 1099  |



**Supplementary Table 5. Net survival per time period and change over time for *de novo* metastatic cancer, per cancer type**

|                             | 1 year NS (%)       |                     |            |       | 5 year              |                     |            |       |
|-----------------------------|---------------------|---------------------|------------|-------|---------------------|---------------------|------------|-------|
|                             | 1989-93 (95%<br>CI) | 2014-18 (95%<br>CI) | Chang<br>e | P     | 1989-93 (95%<br>CI) | 2014-18 (95%<br>CI) | Chang<br>e | P     |
| Pancreas                    | 5 (4-5)             | 10 (10-11)          | 6          | <0.01 | 0 (0-1)             | 1 (1-2)             | 1          | <0.01 |
| Gallbladder <sup>a</sup>    | 5 (3-6)             | 15 (12-19)          | 11         | <0.01 | 1 (0-2)             | 1 (1-3)             | 1          | 0.10  |
| Hepatocellular <sup>b</sup> | 6 (4-8)             | 13 (11-16)          | 7          | <0.01 | 1 (0-3)             | 1 (1-3)             | 0          | 0.16  |
| Bile Ducts                  | 8 (6-10)            | 18 (16-19)          | 10         | <0.01 | 0 (0-0)             | 1 (0-1)             | 1          | <0.01 |
| Long other <sup>a</sup>     | 9 (8-11)            | 11 (9-14)           | 2          | <0.01 | 1 (0-2)             | 3 (2-4)             | 2          | <0.01 |
| NSCLC                       | 9 (9-10)            | 28 (27-28)          | 18         | <0.01 | 1 (0-1)             | 7 (6-7)             | 6          | <0.01 |
| Stomach                     | 12 (11-13)          | 20 (19-21)          | 8          | <0.01 | 1 (1-2)             | 2 (1-3)             | 1          | 0.05  |
| Esophagus/Cardia            | 12 (11-13)          | 23 (22-24)          | 11         | <0.01 | 1 (1-2)             | 3 (2-3)             | 2          | <0.01 |
| SCLC                        | 13 (13-14)          | 22 (21-23)          | 9          | <0.01 | 1 (0-1)             | 2 (2-2)             | 1          | <0.01 |
| Unknown                     | 14 (14-14)          | 16 (15-16)          | 2          | <0.01 | 4 (3-4)             | 7 (6-8)             | 3          | <0.01 |
| Other                       | 17 (15-19)          | 32 (30-34)          | 16         | <0.01 | 5 (3-6)             | 11 (9-13)           | 7          | <0.01 |
| Bladder                     | 19 (16-22)          | 25 (24-27)          | 6          | <0.01 | 3 (2-5)             | 7 (5-8)             | 3          | <0.01 |
| HNSCC <sup>a</sup>          | 23 (17-29)          | 28 (22-34)          | 5          | <0.01 | 7 (3-13)            | 6 (3-9)             | -1         | 0.60  |
| Kidney                      | 28 (26-30)          | 42 (40-44)          | 14         | <0.01 | 6 (5-7)             | 12 (11-14)          | 7          | <0.01 |
| Colon                       | 28 (27-29)          | 51 (50-52)          | 23         | <0.01 | 4 (3-5)             | 14 (13-15)          | 10         | <0.01 |
| Sarcoma                     | 32 (28-36)          | 45 (41-49)          | 14         | <0.01 | 7 (5-10)            | 14 (10-17)          | 6          | <0.01 |
| Cervix Uteri                | 33 (27-40)          | 54 (49-59)          | 21         | <0.01 | 9 (5-14)            | 22 (17-27)          | 13         | <0.01 |
| Rectum                      | 34 (33-36)          | 59 (58-61)          | 25         | <0.01 | 4 (3-5)             | 14 (13-16)          | 11         | <0.01 |
| GIST <sup>a</sup>           | 36 (26-46)          | 86 (78-91)          | 50         | <0.01 | 8 (3-15)            | 53 (42-63)          | 46         | <0.01 |
| Corpus Uteri <sup>a</sup>   | 38 (33-43)          | 49 (45-53)          | 11         | <0.01 | 18 (13-23)          | 16 (12-20)          | -2         | 0.18  |
| Ovary                       | 41 (38-43)          | 62 (60-64)          | 21         | <0.01 | 6 (5-8)             | 16 (14-18)          | 10         | <0.01 |
| Melanoma                    | 48 (44-52)          | 62 (59-65)          | 14         | <0.01 | 23 (20-27)          | 39 (35-43)          | 16         | <0.01 |
| Vulva/vagina <sup>b</sup>   | 50 (23-71)          | 23 (15-32)          | -27        | 0.03  | 9 (3-18)            | 6 (2-13)            | -3         | 0.34  |
| NET                         | 59 (54-64)          | 84 (81-87)          | 25         | <0.01 | 26 (21-31)          | 57 (52-62)          | 32         | <0.01 |
| Breast                      | 60 (58-62)          | 76 (74-77)          | 15         | <0.01 | 14 (13-16)          | 33 (31-35)          | 18         | <0.01 |
| Thyroid                     | 60 (52-67)          | 63 (57-68)          | 3          | 0.26  | 32 (23-41)          | 49 (42-56)          | 17         | <0.01 |
| Testicular <sup>c</sup>     | 77 (68-84)          | 87 (75-94)          | 10         | <0.01 | 66 (55-74)          | 84 (71-91)          | 18         | <0.01 |
| Prostate                    | 79 (78-80)          | 89 (88-99)          | 10         | <0.01 | 23 (22-24)          | 42 (41-44)          | 19         | <0.01 |

a Age strata with < 10 patients in one or more diagnostic groups but analyses not adjusted because NS could be estimated. See supplemental table 7 for unweighted results for these groups. b Cancers from whom NS could not be estimated and thus, the diagnostic groups were adjusted: Hepatocellular, vulva/vagina, bile ducts: 2014-2017 instead of 2014-2018. c Testicular cancer: Adjusted weight groups because barely any patients aged 75+ with testicular cancer and 0 in 2014-18: changed from 60% 18-44, 10% 45-55, 10% 55-65, 10% 65-75, 10% 75+ to 60% 18-44, 10% 45-55, 10% 55-65, 20% 65+

Abbreviations: CI: confidence intervals; HNSCC: head and neck squamous cell carcinoma; NET: Neuroendocrine Tumors; NS: Net survival; GIST: Gastrointestinal stromal tumors; SCLC: small cell lung cancer; NSCLC: non-small cell lung cancer.

**Supplementary Table 6. Net survival for patients with de novo metastatic cancer, not standardized by age, per time period and change. For cancers with < 10 patients in at least one of the age strata in 1989-1993 and/or 2014-2018**

|                             | 1 year NS (%)    |                  |        | 5 year NS (%)    |                  |        |
|-----------------------------|------------------|------------------|--------|------------------|------------------|--------|
|                             | 1989-93 (95% CI) | 2014-18 (95% CI) | Change | 1989-93 (95% CI) | 2014-18 (95% CI) | Change |
| HNSCC <sup>a</sup>          | 26 (19-33)       | 27 (23-32)       | 1      | 8 (4-14)         | 6 (4-10)         | -1     |
| Hepatocellular <sup>a</sup> | 7 (5-10)         | 13 (11-15)       | 6      | 1 (0-4)          | 1 (0-2)          | -1     |
| Gallbladder <sup>a</sup>    | 4 (3-5)          | 13 (11-16)       | 9      | 1 (0-2)          | 2 (0-4)          | 1      |
| GIST <sup>a</sup>           | 47 (33-59)       | 86 (79-90)       | 39     | 10 (4-20)        | 51 (41-61)       | 41     |
| Lung other <sup>b</sup>     | 8 (7-9)          | 8 (8-9)          | 0      | 1 (0-1)          | 2 (1-3)          | 1      |
| Vulva/vagina                | 42 (25-58)       | 30 (22-39)       | -12    | 12 (3-28)        | 8 (3-16)         | -5     |
| Corpus Uteri                | 40 (34-46)       | 48 (44-52)       | 8      | 18 (13-23)       | 13 (10-16)       | -5     |
| Testicular <sup>a</sup>     | 88 (82-92)       | 94 (90-96)       | 6      | 77 (71-82)       | 87 (83-91)       | 10     |

<sup>a</sup>Limited number (<20) of patients in several age strata: HNSCC, Gallbladder, GIST, Vulva/vagina (max 38 pts in one group), Testicular (0 in group 75+ in 2014-18).

Hepatocellular; <sup>b</sup>Limited number of patients (<20) in one age stratum: Lung other in age group 18-44, Corpus uteri in age group 18-44

Abbreviations: CI: Confidence Interval; HNSCC: head and neck squamous cell carcinoma; NS: Net survival; GIST: Gastrointestinal stromal tumors.

**Supplementary Table 7. Survival of patients with *de novo* melanoma, a comparison of net survival and changes with and without unknown primary tumors in the analyses**

|                                  | 1 year NS (%)                 |                               |        | 5 year NS (%)                 |                               |        |
|----------------------------------|-------------------------------|-------------------------------|--------|-------------------------------|-------------------------------|--------|
|                                  | 1989-93 (95%<br>CI)<br>N=440  | 2014-18 (95%<br>CI)<br>N=1041 | Change | 1989-93 (95%<br>CI)<br>N=440  | 2014-18 (95%<br>CI)<br>N=1041 | Change |
| Melanoma with unknown primary    | 48 (44-52)                    | 62 (59-65)                    | 14     | 23 (20-27)                    | 39 (35-43)                    | 16     |
|                                  | 1989-93 (95%<br>CI)<br>N= 129 | 2014-18 (95%<br>CI)<br>N= 259 | Change | 1989-93 (95%<br>CI)<br>N= 129 | 2014-18 (95%<br>CI)<br>N= 259 | Change |
| Melanoma without unknown primary | 44 (36-52)                    | 57 (51-64)                    | 13     | 21 (14-28)                    | 23 (16-30)                    | 2      |

Abbreviations: CI: Confidence Interval; N: Sample size; NS: Net survival.

**Supplementary Table 8. Median survival (months) of patients diagnosed in 1989-1993 and in 2014-2018, per cancer type**

|                                      | Median survival in months |           |        |
|--------------------------------------|---------------------------|-----------|--------|
|                                      | 1989-1993                 | 2014-2018 | Change |
| Prostate                             | 22.8                      | 39.4      | 16.6   |
| Testicular                           | n.a.                      | n.a.      | n.a.   |
| Thyroid                              | 8.7                       | 10.2      | 1.5    |
| Breast                               | 16.9                      | 35.2      | 18.3   |
| NET                                  | 22.3                      | 64.4      | 42.1   |
| Vulva/vagina                         | 6.0                       | 5.1       | -0.9   |
| Melanoma                             | 10.1                      | 18.1      | 8.0    |
| Ovarian                              | 8.6                       | 16.5      | 7.9    |
| Corpus uteri                         | 6.9                       | 10.9      | 4.0    |
| GIST                                 | 9.0                       | 51.8      | 42.8   |
| Rectum                               | 7.6                       | 16.1      | 8.5    |
| Cervix uteri                         | 7.4                       | 13.2      | 5.8    |
| Sarcoma                              | 5.7                       | 8.6       | 2.9    |
| Colon                                | 5.5                       | 11.4      | 5.9    |
| Kidney                               | 5.2                       | 8.1       | 2.9    |
| HNSCC                                | 5.5                       | 5.6       | 0.1    |
| Bladder                              | 3.8                       | 4.3       | 0.5    |
| Other solid cancers                  | 1.9                       | 1.5       | -0.4   |
| Cancers with an unknown primary site | 2.8                       | 5.3       | 2.5    |
| SCLC                                 | 4.3                       | 5.7       | 1.4    |
| Esophagus/Cardia                     | 3.7                       | 5.2       | 1.5    |
| Stomach                              | 2.9                       | 4.0       | 1.1    |
| NSCLC                                | 3.1                       | 5.0       | 1.9    |
| Lung other                           | 1.8                       | 1.4       | -0.4   |
| Bile Ducts                           | 2.3                       | 3.7       | 1.4    |
| Hepatocellular                       | 1.9                       | 2.3       | 0.4    |
| Gallbladder                          | 2.2                       | 3.4       | 1.2    |
| Pancreas                             | 2.0                       | 2.3       | 0.3    |
| Total                                | 4.1                       | 6.9       | 2.8    |

Abbreviations: GIST: Gastrointestinal stromal tumors; HNSCC: head and neck squamous cell carcinoma; NETs: Neuroendocrine Tumors; NSCLC: non-small cell lung cancer;

SCLC: small cell lung cancer

## Supplementary Table 9. Search methods to identify cancer medicines introduced in the Netherlands and the year of introduction for the different types of cancers

The Netherlands Cancer Registry does not collect data about treatment of patients beyond first line. Moreover, it only started collecting information on drug names/classes recently. As such, we collected information (type and date of approval) about the types of cancer medicines per cancer type that were theoretically available for patients with different types of cancers. The approach used is described in the table below. Briefly, we only collected information on newly approved medicines and extensions of indications listed in Summary of Product Characteristics documents. The medicines were categorized by the year of approval or reimbursement and recorded for their first approved use for each cancer type.

| Steps                                                                             | Explanation                                                                                                                                                                                                                                                                                                                                                                                                                                                                                                                                                                                                                                                                                          |     |
|-----------------------------------------------------------------------------------|------------------------------------------------------------------------------------------------------------------------------------------------------------------------------------------------------------------------------------------------------------------------------------------------------------------------------------------------------------------------------------------------------------------------------------------------------------------------------------------------------------------------------------------------------------------------------------------------------------------------------------------------------------------------------------------------------|-----|
| <b>Identification of cancer medicines used in the Netherlands per cancer type</b> |                                                                                                                                                                                                                                                                                                                                                                                                                                                                                                                                                                                                                                                                                                      |     |
| 1                                                                                 | We identified all different types of cancer medicines currently used for the different cancer types in the Netherlands. For this purpose, we consulted the website <a href="https://www.bijwerkingenbijkanker.nl/">https://www.bijwerkingenbijkanker.nl/</a> . This website contains information on treatment, treatment regimens, and adverse events related to these treatments. The website is developed by Netherlands Comprehensive Cancer Organization in consultation with several clinical experts and is updated regularly.                                                                                                                                                                 | 5   |
| 2                                                                                 | We consulted the website of the Association for Medical Oncology in the Netherlands (NVMO). This association has set up a committee since October 1999 and reviews all new European Medicine Association (EMA) approved medicines on clinical value. The objective is to achieve national coordination regarding the use of new and often expensive medicines in clinical practice. On the website, the assessments and final judgment of all new cancer drugs can be found, including a detailed report which describes the considerations for the choice. In our overview of drugs per cancer type, we excluded medicines that received a negative advice from the committee of the NVMO.          | 6   |
| 3                                                                                 | For a couple of cancer types, the website ( <a href="https://www.bijwerkingenbijkanker.nl/">https://www.bijwerkingenbijkanker.nl/</a> ) did not contain information regarding treatment. This was the case for vaginal cancer and NET. Information on systemic treatments for NET was obtained from the European Neuroendocrine Tumor Society (ENET) guidelines. Information on systemic treatment for vaginal cancer was obtained from an international website.                                                                                                                                                                                                                                    | 7   |
| <b>Identification of date of approval of new drugs from 1989-2018</b>             |                                                                                                                                                                                                                                                                                                                                                                                                                                                                                                                                                                                                                                                                                                      |     |
| 1                                                                                 | The EMA documentation was consulted to identify the date of approval for each drug and indication. We consulted the EMA ‘authorization details’ to identify the date of approval for the first indication of a drug. The date of approval of the extension of indications was obtained from the document ‘Procedural steps taken and scientific information after the authorization’. It should be noted that the EMA was established in 1995, and thus no information from drugs approved before this date could be obtained from this institute.                                                                                                                                                   | EMA |
| 2                                                                                 | For some drugs, the EMA ‘Procedural steps taken and scientific information after the authorization’ did not provide all extension of indications, especially information on steps taken in EMAs early years was sometimes lacking. If this was the case, we consulted the European Commission (EC) Register of SmPCs per medicine, which can be found on: <a href="http://ec.europa.eu/health/documents/community-register/html/reg_hum_act.htm?sort=a">http://ec.europa.eu/health/documents/community-register/html/reg_hum_act.htm?sort=a</a> . By comparing the changes in the documents over time, it was possible to identify which new extensions of indication were added on a specific date. | 8   |
| 2                                                                                 | The date of approval of drugs for whom no information on the EMA or EC website was obtained from different sources. The first was a personal document created by a professor from the Erasmus School of Health Policy and Management the Netherlands (Erasmus University). This document contained the date of approval of all drugs in the Netherlands since 1989. The document included only the first indication for whom a medicine was approved.                                                                                                                                                                                                                                                |     |
| 3.                                                                                | The second source was the website of the Dutch Medicines Evaluation Board (CBG). This is the national medicines authority in the Netherlands, and information on approval date per drugs can be found on the website. Limitation is that the CBG does not have information on extensions of indications. Therefore, the CBG website was only consulted to identify the date of approval for the first indication and only before 1995.                                                                                                                                                                                                                                                               | CBG |
| 4.                                                                                | The third sources was the publication of Sun et al. 2017 and the website of the Food and Drug Administration (FDA). The publications of Sun et al. reported all FDA approved anti-cancer drugs                                                                                                                                                                                                                                                                                                                                                                                                                                                                                                       | FDA |

|                                                                                                                                     |                                                                                                                                                                                                                                                                                                                                                                                                                                                                                                                                                                                                                                                                                                     |                  |
|-------------------------------------------------------------------------------------------------------------------------------------|-----------------------------------------------------------------------------------------------------------------------------------------------------------------------------------------------------------------------------------------------------------------------------------------------------------------------------------------------------------------------------------------------------------------------------------------------------------------------------------------------------------------------------------------------------------------------------------------------------------------------------------------------------------------------------------------------------|------------------|
|                                                                                                                                     | including the year of approval from 1949 onwards. On the FDA website, information on approval, and extensions of indications can be found. It should be noted that the FDA approves drugs for the United States and thus, the approval date of the FDA is a rough estimate of the introduction date in the Netherlands.                                                                                                                                                                                                                                                                                                                                                                             | & <sup>9</sup>   |
| 5.                                                                                                                                  | The last source we consulted was the website of the ASCO. The ASCO reports a timeline with breakthrough developments for different cancer types, including drugs. This is also an American website and thus only provides a rough estimate of the introduction date in the Netherlands.                                                                                                                                                                                                                                                                                                                                                                                                             | <sup>10</sup>    |
| <b>Date of approval of indications for whom a drug is not formally approved but is national and international standard practice</b> |                                                                                                                                                                                                                                                                                                                                                                                                                                                                                                                                                                                                                                                                                                     |                  |
| 6.                                                                                                                                  | Some cancer drugs are used in clinical practice based on clinical evidence but used off label because the drug has never been EMA approved for this indication.. This includes mainly the older cytotoxic drugs. These drugs are not listed in de graph of our study because no data is available about the use of these drugs in clinical practice.                                                                                                                                                                                                                                                                                                                                                |                  |
| <b>Date of approval of medicines for which reimbursement came later than regulatory approval</b>                                    |                                                                                                                                                                                                                                                                                                                                                                                                                                                                                                                                                                                                                                                                                                     |                  |
| 7.                                                                                                                                  | In 2015, the Netherlands government changed their reimbursement procedures. Whereas previously most new inpatient medicines automatically received reimbursement, the government then created an option to postpone reimbursement decisions of new high priced medicines with an expected substantial budget impact. If postponements in reimbursement took place, we used the date of approval of reimbursement in our overview. If medicines were excluded from reimbursement, we assumed they would not be used in clinical practice and thus did not include them in our overview. Reimbursement dates were obtained from the website of the National Health Care institute of the Netherlands. | <sup>12,13</sup> |

Abbreviations: ASCO: American society of clinical oncology, CBG: Medicines evaluation board [In Dutch: College ter Beoordeling van Geneesmiddelen] EC: European commission; EMA: European medicines association; ENET: ; FDA: United States Food and Drug Administration; NET: neuroendocrine tumors; NVMO: Association for Medical Oncology in the Netherlands [In Dutch: Nederlandse vereniging voor medische oncologie]; SmPC: Summary of product characteristics.

**Supplementary Table 10. Novel medicines and extensions of indications per metastatic cancer, for the metastatic cancer types included in our study, year of introduction, source of approval year**

| Nr | Tumor                    | Year         | cBOM | Group            | Substance     | In SmPC | Source approval date |
|----|--------------------------|--------------|------|------------------|---------------|---------|----------------------|
|    |                          |              |      |                  |               |         |                      |
|    | HNSCC                    | <sup>a</sup> | n.j. | Cytotoxic        | Carboplatin   | No      | n.a.                 |
| 1  | HNSCC                    | 2006         | 2008 | Cytotoxic        | Docetaxel     | Yes     | EC                   |
| 2  | HNSCC                    | 2008         | 2009 | Targeted Therapy | Cetuximab     | Yes     | EMA ext              |
|    | HNSCC                    | 2017         | 2017 | Immunotherapy    | Nivolumab     | Yes     | EMA ext – cBOM neg   |
| 3  | HNSCC                    | 2018         | 2019 | Immunotherapy    | Pembrolizumab | Yes     | EMA ext              |
|    |                          |              |      |                  |               |         |                      |
|    | Esophagus/Cardia         | <sup>a</sup> | n.j. | Cytotoxic        | Carboplatin   | No      | n.a.                 |
|    | Esophagus/Cardia         | <sup>a</sup> | n.j. | Cytotoxic        | Paclitaxel    | No      | n.a.                 |
|    | Esophagus/Cardia         | <sup>a</sup> | n.j. | Cytotoxic        | Epirubicin    | No      | n.a.                 |
|    | Esophagus/Cardia         | <sup>a</sup> | n.j. | Cytotoxic        | Irinotecan    | No      | n.a.                 |
|    | Esophagus/Cardia         | <sup>a</sup> | n.j. | Cytotoxic        | Capecitabine  | No      | n.a.                 |
|    | Esophagus/Cardia         | <sup>a</sup> | n.j. | Cytotoxic        | Oxaliplatin   | No      | n.a.                 |
| 1  | Esophagus/Cardia         | 2006         | n.j. | Cytotoxic        | Docetaxel     | Yes     | EC                   |
| 2  | Esophagus/Cardia         | 2010         | 2010 | Targeted Therapy | Trastuzumab   | Yes     | EMA - ext            |
| 3  | Esophagus/Cardia         | 2014         | 2015 | Targeted Therapy | Ramucirumab   | Yes     | EMA - ext            |
|    |                          |              |      |                  |               |         |                      |
|    | Stomach                  | <sup>a</sup> | n.j. | Cytotoxic        | Carboplatin   | No      | n.a.                 |
|    | Stomach                  | <sup>a</sup> | n.j. | Cytotoxic        | Irinotecan    | No      | n.a.                 |
| 1  | Stomach                  | 1997         | n.j. | Cytotoxic        | Epirubicin    | Yes     | Estimate             |
|    | Stomach                  | 2006         | 2007 | Cytotoxic        | Docetaxel     | Yes     | EMA ext / cBOM neg   |
| 2  | Stomach                  | 2007         | n.j. | Cytotoxic        | Capecitabine  | Yes     | EMA ext              |
| 3  | Stomach                  | 2007         | n.j. | Cytotoxic        | Oxaliplatin   | Yes     | EMA ext              |
| 4  | Stomach                  | 2010         | 2010 | Targeted Therapy | Trastuzumab   | Yes     | EMA ext              |
|    | Stomach                  | 2011         | 2012 | Cytotoxic        | S-1 (Teysuno) | Yes     | EMA / cBOM neg       |
| 5  | Stomach                  | 2014         | 2015 | Targeted Therapy | Ramucirumab   | Yes     | EMA                  |
|    |                          |              |      |                  |               |         |                      |
| 1  | Hepatocellular carcinoma | 2007         | n.j. | Targeted Therapy | Sorafenib     | Yes     | EMA ext              |
| 2  | Hepatocellular carcinoma | 2017         | 2017 | Targeted Therapy | Regorafenib   | Yes     | EMA ext              |
| 3  | Hepatocellular carcinoma | 2018         | 2019 | Targeted Therapy | Lenvatinib    | Yes     | EMA ext              |
|    |                          |              |      |                  |               |         |                      |
|    | Gallbladder/Bile ducts   | <sup>a</sup> | n.j. | Cytotoxic        | Epirubicin    | No      | n.a.                 |
|    | Gallbladder/Bile ducts   | <sup>a</sup> | n.j. | Cytotoxic        | Etoposide     | No      | n.a.                 |
|    | Gall bladder/Bile ducts  | <sup>a</sup> | n.j. | Cytotoxic        | Cisplatin     | No      | n.a.                 |
|    | Gallbladder/Bile ducts   | <sup>a</sup> | n.j. | Cytotoxic        | Gemcitabine   | No      | n.a.                 |
|    | Gallbladder/Bile ducts   | <sup>a</sup> | n.j. | Cytotoxic        | Oxaliplatin   | No      | n.a.                 |

|    |                        |                        |      |                  |                              |     |                                                                                  |
|----|------------------------|------------------------|------|------------------|------------------------------|-----|----------------------------------------------------------------------------------|
|    | Gallbladder/Bile ducts | <sup>a</sup>           | n.j. | Cytotoxic        | Capecitabine                 | No  | n.a.                                                                             |
| 1  | Pancreas               | 1996                   | 2001 | Cytotoxic        | Gemcitabine                  | Yes | FDA                                                                              |
| 2  | Pancreas               | 2007                   | n.j. | Targeted therapy | Erlotinib                    | Yes | EMA ext                                                                          |
| 3  | Pancreas               | 2012                   | 2012 | Regime           | FOLFIRINOX                   | Yes | cBOM                                                                             |
| 4  | Pancreas               | 2013                   | 2015 | Cytotoxic        | Nab-Paclitaxel               | Yes | EMA ext /<br>cBOM neg<br>later pos                                               |
| 5  | Pancreas               | 2016                   | 2017 | Cytotoxic        | Irinotecan liposomaal        | Yes | EC                                                                               |
| 1  | GIST                   | 2002                   | n.j. | Targeted therapy | Imatinib                     | Yes | EMA - ext                                                                        |
| 2  | GIST                   | 2006                   | n.j. | Targeted therapy | Sunitinib                    | Yes | EMA                                                                              |
| 3  | GIST                   | 2014                   | 2014 | Targeted therapy | Regorafenib                  | Yes | EMA ext                                                                          |
|    | SCLC                   | <sup>a</sup>           | n.j. | Cytotoxic        | Carboplatin                  | Yes | n.a.                                                                             |
|    | SCLC                   | <sup>a</sup>           | n.j. | Cytotoxic        | Teniposide                   | ??  | n.a.                                                                             |
|    | SCLC                   | <sup>a</sup>           | n.j. | Cytotoxic        | Paclitaxel                   | No  | n.a.                                                                             |
|    | SCLC                   | <sup>a</sup>           | n.j. | Cytotoxic        | Docetaxel                    | No  | n.a.                                                                             |
| 1  | SCLC                   | 2006                   | 2008 | Cytotoxic        | Topotecan                    | Yes | EMA ext                                                                          |
|    | NSCLC                  | <sup>a</sup>           | n.j. | Cytotoxic        | Carboplatin                  | Yes | n.a.                                                                             |
|    | NSCLC                  | ??                     | n.j. | Cytotoxic        | Cisplatin                    | Yes | n.a.                                                                             |
|    | NSCLC                  | <sup>a</sup>           | n.j. | Cytotoxic        | Paclitaxel                   | Yes | n.a.                                                                             |
|    | NSCLC                  | <sup>a</sup>           | n.j. | Cytotoxic        | Vinorelbine                  | Yes | n.a.                                                                             |
| 1  | NSCLC                  | 1998                   | n.j. | Cytotoxic        | Gemcitabine                  | Yes | FDA                                                                              |
| 2  | NSCLC                  | 2000                   | 2003 | Cytotoxic        | Docetaxel                    | Yes | EC                                                                               |
| 3  | NSCLC                  | 2004                   | 2005 | Cytotoxic        | Pemetrexed                   | Yes | EMA                                                                              |
| 4  | NSCLC                  | 2005                   | 2006 | Targeted therapy | Erlotinib                    | Yes | EMA                                                                              |
| 5  | NSCLC                  | 2007                   | 2008 | Targeted therapy | Bevacizumab                  | Yes | EMA ext –<br>cBOM only<br>for pts with<br>contra-<br>indication<br>for cisplatin |
| 6  | NSCLC                  | 2009                   | 2010 | Targeted therapy | Gefitinib                    | Yes | EMA                                                                              |
| 7  | NSCLC                  | 2012                   | 2013 | Targeted therapy | Crizotinib                   | Yes | EMA                                                                              |
| 8  | NSCLC                  | 2013                   | 2014 | Targeted therapy | Afatinib                     | Yes | EMA                                                                              |
|    | NSCLC                  | 2014                   | 2016 | Targeted therapy | Nintedanib                   | Yes | EMA /<br>cBOM neg                                                                |
| 9  | NSCLC                  | 2015                   | 2018 | Targeted therapy | Ceritinib                    | Yes | EMA                                                                              |
| 10 | NSCLC                  | 2015                   | n.j. | Cytotoxic        | Nab-Paclitaxel<br>(Abraxane) | Yes | EC                                                                               |
| 11 | NSCLC                  | 2015/2016 <sup>R</sup> | 2015 | Immunotherapy    | Nivolumab                    | Yes | EMA ext                                                                          |
| 12 | NSCLC                  | 2016                   | 2017 | Targeted therapy | Osimertinib                  | Yes | EMA                                                                              |
| 13 | NSCLC                  | 2016/2017 <sup>R</sup> | 2017 | Immunotherapy    | Pembrolizumab                | Yes | EMA ext                                                                          |
|    | NSCLC                  | 2016                   | 2016 | Targeted therapy | Ramucirumab                  | Yes | EMA ext -<br>cBOM neg                                                            |
| 14 | NSCLC                  | 2017                   | 2018 | Targeted therapy | Alectinib                    | Yes | EMA                                                                              |
| 15 | NSCLC                  | 2017/2018 <sup>R</sup> | 2018 | Immunotherapy    | Atezolizumab                 | Yes | EMA                                                                              |
| 16 | NSCLC                  | 2017                   | n.j. | Targeted therapy | Trametinib                   | Yes | EMA ext                                                                          |
| 17 | NSCLC                  | 2017                   | n.j. | Targeted therapy | Dabrafenib                   | Yes | EMA ext                                                                          |
| 18 | NSCLC                  | 2018                   | 2020 | Targeted therapy | Durvalumab                   | Yes | EMA                                                                              |
| 19 | NSCLC                  | 2018                   | 2020 | Targeted therapy | Brigatinib                   | Yes | EMA                                                                              |



|    |                |              |      |                  |                           |     |                                             |
|----|----------------|--------------|------|------------------|---------------------------|-----|---------------------------------------------|
| 1  | Melanoma       | 2011         | 2011 | Immunotherapy    | Ipilimumab                | Yes | EMA                                         |
| 2  | Melanoma       | 2012         | 2012 | Targeted therapy | Vemurafenib               | Yes | EMA                                         |
| 3  | Melanoma       | 2013         | 2014 | Targeted therapy | Dabrafenib                | Yes | EMA                                         |
| 4  | Melanoma       | 2014         | 2016 | Targeted therapy | Trametinib                | Yes | EMA                                         |
| 5  | Melanoma       | 2015         | 2016 | Targeted therapy | Cobimetinib               | Yes | EMA                                         |
| 6  | Melanoma       | 2015         | 2015 | Immunotherapy    | Nivolumab                 | Yes | EMA                                         |
| 7  | Melanoma       | 2015         | 2016 | Immunotherapy    | Pembrolizumab             | Yes | EMA                                         |
| 8  | Melanoma       | 2015         | 2017 | Viral therapy    | Talimogene laherparepvec  | Yes | EMA / cBOM clinical value not assessable    |
| 9  | Melanoma       | 2018         | 2019 | Targeted therapy | Binimetinib               | Yes | EMA                                         |
| 10 | Melanoma       | 2018         | 2019 | Targeted therapy | Encorafenib               | Yes | EMA                                         |
|    | Bone           | <sup>a</sup> | n.j. | Cytotoxic        | Gemcitabine               | No  | n.a.                                        |
|    | Sarcoma        | <sup>a</sup> | n.j. | Cytotoxic        | Docetaxel                 | No  | **                                          |
|    | Sarcoma        | <sup>a</sup> | n.j. | Cytotoxic        | Gemcitabine               | No  | **                                          |
| 1  | Sarcoma        | 1998         | n.j. | Cytotoxic        | Paclitaxel                | Yes | Estimate                                    |
| 2  | Sarcoma        | 2006         | n.j. | Targeted therapy | Imatinib                  | Yes | EMA ext                                     |
| 3  | Sarcoma        | 2007         | n.j. | Cytotoxic        | Trabectedine              | Yes | Steenhoek                                   |
| 4  | Sarcoma        | 2012         | 2013 | Targeted therapy | Pazopanib                 | Yes | EMA ext                                     |
| 5  | Sarcoma (Bone) | 2014         | n.j. | Targeted therapy | Denosumab                 | Yes | EMA ext                                     |
| 6  | Sarcoma        | 2016         | 2018 | Cytotoxic        | Eribulin                  | Yes | EMA ext                                     |
|    | Sarcoma        | 2016         | 2017 | Targeted therapy | Olaratumab                | Yes | EMA – cBOM neg, no longer authorized by EMA |
|    | Breast         | <sup>a</sup> | n.j. | Cytotoxic        | Carboplatin               | No  | n.a.                                        |
| 1  | Breast         | 1995         | 2000 | Cytotoxic        | Docetaxel                 | Yes | EMA                                         |
| 2  | Breast         | 1996         | 2001 | Hormonal therapy | Anastrozol                | Yes | Steenhoek                                   |
| 3  | Breast         | 1997         | 2001 | Hormonal therapy | Letrozol                  | Yes | Steenhoek / SmPC                            |
| 4  | Breast         | 1999         | 2001 | Hormonal Therapy | Exemestane                | Yes | Steenhoek / SmPC                            |
| 5  | Breast         | 2000         | 2001 | Targeted therapy | Trastuzumab               | Yes | EMA                                         |
|    | Breast         | 2001         | 2001 | Cytotoxic        | Vinorelbine               | Yes | cBOM - neg                                  |
| 6  | Breast         | 2002         | 2003 | Cytotoxic        | Capecitabine              | Yes | EC                                          |
| 7  | Breast         | 2003         | 2005 | Cytotoxic        | Doxorubicin (liposomaal)  | Yes | EC                                          |
| 8  | Breast         | 2004         | 2004 | Hormonal therapy | Fulvestrant               | Yes | EMA                                         |
| 9  | Breast         | 2004         | 2009 | Cytotoxic        | Gemcitabine               | Yes | ASCO                                        |
| 10 | Breast         | 2007         | 2008 | Targeted therapy | Bevacizumab               | Yes | EMA - ext                                   |
| 11 | Breast         | 2008         | 2008 | Targeted therapy | Lapatinib                 | Yes | EMA                                         |
|    | Breast         | 2008         | 2012 | Cytotoxic        | Nab-Paclitaxel (Abraxane) | Yes | EC / cBOM neg                               |
| 12 | Breast         | 2011         | 2011 | Cytotoxic        | Eribulin                  | Yes | EMA                                         |
| 13 | Breast         | 2012         | 2012 | Targeted therapy | Everolimus                | Yes | EMA ext                                     |

|    |              |                        |      |                  |                           |     |                    |
|----|--------------|------------------------|------|------------------|---------------------------|-----|--------------------|
| 14 | Breast       | 2013                   | n.j. | Targeted therapy | Trastuzumab-Emtansine     | Yes | EMA                |
| 15 | Breast       | 2013                   | 2013 | Targeted therapy | Pertuzumab                | Yes | EMA                |
| 16 | Breast       | 2016/2017 <sup>b</sup> | 2017 | Targeted therapy | Palbociclib               | Yes | EMA                |
| 17 | Breast       | 2017/2018 <sup>b</sup> | 2017 | Targeted therapy | Ribociclib                | Yes | EMA                |
| 18 | Breast       | 2018/2019 <sup>b</sup> |      | Targeted therapy | Abemaciclib               | Yes | EMA                |
|    |              |                        |      |                  |                           |     |                    |
|    | Vulva        | <sup>a</sup>           | n.j. | Cytotoxic        | Capecitabine              | No  | n.a.               |
|    | Vulva        | <sup>a</sup>           | n.j. | Cytotoxic        | Carboplatin               | No  | n.a.               |
|    | Vulva        | <sup>a</sup>           | n.j. | Cytotoxic        | Cisplatin                 | No  | n.a.               |
|    | Vulva        | <sup>a</sup>           | n.j. | Cytotoxic        | Docetaxel                 | No  | n.a.               |
|    | Vulva        | <sup>a</sup>           | n.j. | Cytotoxic        | Paclitaxel                | No  | n.a.               |
|    | Vulva        | <sup>a</sup>           | n.j. | Cytotoxic        | Topotecan                 | No  | n.a.               |
|    |              | <sup>a</sup>           |      |                  |                           |     |                    |
|    | Vaginal      | <sup>a</sup>           | n.j. | Cytotoxic        | Carboplatin               | No  | n.a.               |
|    | Vaginal      | <sup>a</sup>           | n.j. | Cytotoxic        | Cisplatin                 | No  | n.a.               |
|    | Vaginal      | <sup>a</sup>           | n.j. | Cytotoxic        | Docetaxel                 | No  | n.a.               |
|    | Vaginal      | <sup>a</sup>           | n.j. | Cytotoxic        | Paclitaxel                | No  | n.a.               |
|    | Vaginal      | <sup>a</sup>           | n.j. | Cytotoxic        | Irinotecan                | No  | n.a.               |
|    |              | <sup>a</sup>           |      |                  |                           |     |                    |
|    | Cervix Uteri | <sup>a</sup>           | n.j. | Cytotoxic        | Carboplatin               | No  | n.a.               |
|    | Cervix Uteri | <sup>a</sup>           | n.j. | Cytotoxic        | Docetaxel                 | No  | n.a.               |
|    | Cervix Uteri | <sup>a</sup>           | n.j. | Cytotoxic        | Paclitaxel                | No  | n.a.               |
| 1  | Cervix Uteri | 2006                   | n.j. | Cytotoxic        | Topotecan                 | Yes | EMA ext            |
| 2  | Cervix Uteri | 2015                   | 2015 | Targeted Therapy | Bevacizumab               | Yes | EMA ext            |
|    |              |                        |      |                  |                           |     |                    |
|    | Corpus uteri | <sup>a</sup>           |      | Cytotoxic        | Carboplatin               | No  | n.a.               |
|    | Corpus uteri | <sup>a</sup>           |      | Cytotoxic        | Paclitaxel                | No  | n.a.               |
|    | Corpus uteri | <sup>a</sup>           |      | Hormonal therapy | Anastrozol                | No  | n.a.               |
|    | Corpus uteri | <sup>a</sup>           |      | Cytotoxic        | Topotecan                 | No  | n.a.               |
|    | Corpus uteri | <sup>a</sup>           |      | Hormonal therapy | Letrozol                  | No  | n.a.               |
|    | Corpus uteri | <sup>a</sup>           |      | Cytotoxic        | Docetaxel                 | No  | n.a.               |
|    | Corpus uteri | <sup>a</sup>           |      | Cytotoxic        | Gemcitabine               | No  | n.a.               |
|    |              | <sup>a</sup>           |      |                  |                           |     |                    |
|    | Ovarian      | <sup>a</sup>           | n.j. | Cytotoxic        | Docetaxel                 | No  | n.a.               |
|    | Ovarian      | <sup>a</sup>           | n.j. | Cytotoxic        | Capecitabine              | No  | n.a.               |
|    | Ovarian      | <sup>a</sup>           | n.j. | Hormonal therapy | Letrozol                  | No  | n.a.               |
|    | Ovarian      | <sup>a</sup>           | n.j. | Hormonal therapy | Anastrozol                | No  | n.a.               |
|    | Ovarian      | <sup>a</sup>           | n.j. | Hormonal therapy | Exemestane                | No  | n.a.               |
|    | Ovarian      | <sup>a</sup>           | n.j. | Cytotoxic        | Nab-Paclitaxel (Abraxane) | No  | n.a.               |
| 1  | Ovarian      | 1989                   | n.j. | Cytotoxic        | Carboplatin               | Yes | Sun et al.         |
| 2  | Ovarian      | 1993                   | n.j. | Cytotoxic        | Paclitaxel                | Yes | Steenhoek          |
| 3  | Ovarian      | 1996                   | n.j. | Cytotoxic        | Topotecan                 | Yes | EMA                |
| 4  | Ovarian      | 2006                   | n.j. | Cytotoxic        | Gemcitabine               | Yes | FDA                |
|    | Ovarian      | 2009                   | 2013 | Cytotoxic        | Trabectedine              | Yes | EMA ext - cBOM neg |
| 5  | Ovarian      | 2011                   | 2013 | Targeted therapy | Bevacizumab               | Yes | EMA - ext          |

|    |          |              |      |                                  |                       |     |                  |
|----|----------|--------------|------|----------------------------------|-----------------------|-----|------------------|
| 6  | Ovarian  | 2014         | 2017 | Targeted therapy                 | Olaparib              | Yes | EMA / cBOM       |
| 7  | Ovarian  | 2018         | 2019 | Targeted therapy                 | Rucaparib             | Yes | EMA              |
| 8  | Ovarian  | 2018         | 2019 | Targeted therapy                 | Niraparib             | Yes | EMA              |
| 1  | Prostate | 1989         | n.j. | Hormonal therapy                 | Gosereline            | Yes | Sun et al. 2016* |
| 2  | Prostate | 1989         | n.j. | Hormonal therapy                 | Flutamide             |     | Sun et al. 2016* |
| 3  | Prostate | 1995         | n.j. | Hormonal therapy                 | Bicalutamide          | Yes | CBG / Steenhoek  |
| 4  | Prostate | 1996         | n.j. | Hormonal therapy                 | Nilutamide (Anandron) | Yes | CBG              |
| 5  | Prostate | 2004         | 2005 | Cytotoxic                        | Docetaxel             | Yes | EC               |
| 6  | Prostate | 2009         | n.j. | Hormonal therapy                 | Degarelix             | Yes | EMA              |
| 7  | Prostate | 2011         | 2012 | Hormonal therapy                 | Abiraterone           | Yes | cBOM             |
| 8  | Prostate | 2011         | 2011 | Cytotoxic                        | Cabazitaxel           | Yes | EMA              |
| 9  | Prostate | 2013         | n.j. | Therapeutic cancer vaccin        | Provenge              | Yes | EMA              |
| 10 | Prostate | 2013         | 2013 | Hormonal Therapy                 | Enzalutamide          | Yes | EMA              |
| 11 | Prostate | 2013         | 2014 | Therapeutic radiopharmaceuticals | Radium 223            | Yes | EMA              |
|    | Testis   | <sup>a</sup> | n.j. | Chemotherapy                     | Paclitaxel            | No  | n.a.             |
| 1  | Kidney   | 1992         |      | Immunotherapy                    | Interleukin-2 (IL-2)  | ??  | ASCO             |
| 2  | Kidney   | 2006         | 2007 | Targeted therapy                 | Sunitinib             | Yes | EMA              |
| 3  | Kidney   | 2006         | 2007 | Targeted therapy                 | Sorafenib             | Yes | EMA              |
| 4  | Kidney   | 2007         | 2008 | Targeted therapy                 | Bevacizumab           | Yes | EMA ext          |
| 5  | Kidney   | 2007         | 2008 | Targeted therapy                 | Temsirolimus          | Yes | EMA              |
| 6  | Kidney   | 2009         | 2010 | Targeted therapy                 | Everolimus            | Yes | EMA              |
| 7  | Kidney   | 2010         | 2011 | Targeted therapy                 | Pazopanib             | Yes | EMA              |
|    | Kidney   | 2012         | 2013 | Targeted therapy                 | Axitinib              | Yes | EMA / cBOM neg   |
| 8  | Kidney   | 2016         | 2017 | Targeted therapy                 | Lenvatinib            | Yes | EMA              |
| 9  | Kidney   | 2016         | 2016 | Immunotherapy                    | Nivolumab             | Yes | EMA ext          |
| 10 | Kidney   | 2016         | 2016 | Targeted therapy                 | Cabozantinib          | Yes | EMA              |
| 11 | Kidney   | 2017         | 2018 | Targeted therapy                 | Tivozanib             | Yes | EMA              |
| 12 | Kidney   | 2018         | 2019 | Immunotherapy                    | Ipilimumab            | Yes | EMA ext          |
| 13 | Kidney   | 2019         | 2020 | Immunotherapy                    | Avelumab              | Yes | EMA ext          |
| 14 | Kidney   | 2019         | 2020 | Immunotherapy                    | Pembrolizumab         | Yes | EMA ext          |
|    | Bladder  | <sup>a</sup> | n.j. | Cytotoxic                        | Carboplatin           | No  | n.a.             |
| 1  | Bladder  | 2000         | 2001 | Cytotoxic                        | Gemcitabine           | Yes | ASCO             |
|    | Bladder  | 2009         | 2010 | Cytotoxic                        | Vinflunin             | Yes | EMA / cBOM neg   |
|    | Bladder  | 2017         | 2018 | Immunotherapy                    | Atezolizumab          | Yes | EMA / cBOM neg   |
| 2  | Bladder  | 2017         | n.j. | Immunotherapy                    | Nivolumab             | Yes | EMA ext          |
| 3  | Bladder  | 2017         | 2017 | Immunotherapy                    | Pembrolizumab         | Yes | EMA ext          |

|   |                |              |       |                  |                                         |     |                                                    |
|---|----------------|--------------|-------|------------------|-----------------------------------------|-----|----------------------------------------------------|
|   |                |              |       |                  |                                         |     |                                                    |
| 1 | Thyroid Gland  | 2012         | 2013  | Targeted therapy | Vandetanib                              | Yes | EMA                                                |
| 2 | Thyroid Gland  | 2014         | 2015  | Targeted therapy | Cabozantinib                            | No  | EMA                                                |
| 3 | Thyroid Gland  | 2014         | 2014  | Targeted therapy | Sorafenib                               | Yes | EMA ext                                            |
| 4 | Thyroid Gland  | 2015         | 2016  | Targeted therapy | Lenvatinib                              | Yes | EMA ext                                            |
|   |                |              |       |                  |                                         |     |                                                    |
| 1 | Colon / Rectum | 1999         | 2001  | Cytotoxic        | Oxaliplatin                             | Yes | Steenhoek                                          |
| 2 | Colon / Rectum | 2000         | 2000  | Cytotoxic        | Irinotecan                              | Yes | FDA / cBOM                                         |
| 3 | Colon / Rectum | 2001         | 2001  | Cytotoxic        | Capecitabine                            | Yes | cBOM                                               |
| 4 | Colon / Rectum | 2002         | 2002  | Cytotoxic        | S-1 (Teysuno)                           | No  | cBOM                                               |
| 5 | Colon / Rectum | 2004         | 2008* | Targeted therapy | Cetuximab                               | Yes | EMA / cBOM neg 2004 – 62008 pos (2008 in timeline) |
| 6 | Colon / Rectum | 2005         | 2005  | Targeted therapy | Bevacizumab                             | Yes | EMA                                                |
| 7 | Colon / Rectum | 2007         | 2008  | Targeted therapy | Panitumumab                             | Yes | EMA                                                |
|   | Colon / Rectum | 2013         | 2013  | Targeted therapy | Regorafenib                             | Yes | EMA / cBOM neg                                     |
|   | Colon / Rectum | 2016         | 2016  | Targeted therapy | Ramucirumab                             | Yes | EMA ext / cBOM neg                                 |
| 8 | Colon / Rectum | 2016         | 2016  | Cytotoxic        | Trifluridine/tipiracil TAS 102(Lonsurf) | Yes | EMA                                                |
|   |                |              |       |                  |                                         |     |                                                    |
|   | Anus           | <sup>a</sup> | n.j.  | Cytotoxic        | Capecitabine                            | No  | n.a.                                               |
|   |                | <sup>a</sup> |       |                  |                                         |     |                                                    |
|   | NET            | <sup>a</sup> | n.j.  | Cytotoxic        | Carboplatin                             | No  | n.a.                                               |
|   |                | <sup>a</sup> |       |                  |                                         |     |                                                    |
|   | NET            | <sup>a</sup> | n.j.  | Cytotoxic        | Dacarbazine                             | No  | ENET guidelines table 2                            |
|   |                | <sup>a</sup> |       |                  |                                         |     |                                                    |
|   | NET            | <sup>a</sup> | n.j.  | Cytotoxic        | Capecitabine                            | No  | ENET guidelines table 2                            |
|   |                | <sup>a</sup> |       |                  |                                         |     |                                                    |
|   | NET            | <sup>a</sup> | n.j.  | Cytotoxic        | Oxaliplatin                             | No  | ENET guidelines table 2                            |
|   |                | <sup>a</sup> |       |                  |                                         |     |                                                    |
|   | NET            | <sup>a</sup> | n.j.  | Cytotoxic        | Temozolomide                            | No  | ENET guidelines table 2                            |
| 1 | NET            | 1992         | n.j.  | SSA              | Octreotide                              | Yes | Quadevlieg et al. <sup>11</sup>                    |
| 2 | NET            | 1998         |       | SSA              | Octreotide LAR                          | Yes | FDA                                                |
| 3 | NET            | 2000         |       | Immunotherapy    | Interferon alfa 2b                      | Yes | EC                                                 |
| 4 | NET            | 2010         | 2011  | Targeted therapy | sunitinib                               | Yes | EMA ext                                            |
| 5 | NET            | 2011         | 2016  | Targeted therapy | everolimus                              | Yes | EMA ext                                            |
| 6 | NET            | 2015         | 2015  | SSA              | lanreotide                              | Yes | cBOM                                               |
| 7 | NET            | 2015         | 2015  | Cytotoxic        | Irinotecan                              | No  | cBOM                                               |
| 8 | NET            | 2017         | 2017  | Other            | lutetium (177Lu) oxodotreotide          | Yes | EC docs                                            |

The medicines and corresponding information presented in light grey text, are 1) medicines that are available for use for patients with the specific cancer type, but were most likely approved prior to 1989; 2) medicines that are EMA approved for the indication but are most likely not used in the Netherlands because the professional association gave a negative advise for using this medicine. Abbreviations: ASCO: American Society of Clinical Oncology; cBOM: committee assessment of oncologic agents; EC: European Commission; ENET: European Neuroendocrine Tumor Society; EMA: European Medicines Association; ext: extension of indication; FDA: Food and Drug Administration

(United States); HNSCC: head and neck squamous cell carcinoma; GIST: Gastrointestinal stromal tumors; n.a.: not applicable; neg: negative; NET: Neuroendocrine tumors; n.j.; not judged; NSCLC: non-small cell lung cancer; pos: positive; SCLC: small cell lung cancer; SmPC; summary of product characteristics; SSA: somatostatin analogues. a year of introduction unknown but likely introduced during the study period as drug was approved for the first indication during the study period or just before. b reimbursement year for medicines for whom drugs required additional evaluations to determine on the reimbursement

Note: drugs including Bleomycin, Cisplatin, Cyclofosamide, Dacarbazine, Dactinomycin, Doxorubicin, Etoposide, Fluorouracil (5-FU), Ifosfamide, Leuprorelin, Medroxyprogesterone, Methotrexate, Megestrol, Streptozocin, Tamoxifen, Vinblastine, Vincristine are assumed to be introduced before 1989 for all tumors.

**Supplementary Table 11. Initial systemic therapies of patients with GIST and breast cancer, obtained from the Netherlands Cancer Registry**

| <b>First line therapy</b>                                     | <b>2014-18</b> |
|---------------------------------------------------------------|----------------|
| <b>GIST</b>                                                   | <b>N = 160</b> |
| Imatinib                                                      | 116 (73%)      |
| TKI ns                                                        | 17 (11%)       |
| Targeted therapy unspecified                                  | 2 (1%)         |
| Only surgery                                                  | 11 (7%)        |
| Other                                                         | 3 (2%)         |
| No therapy                                                    | 11 (7%)        |
| <b>Breast cancer HER2+</b>                                    | <b>N= 808</b>  |
| HER2 targeted therapy (with or without chemo)                 | 667 (83%)      |
| Only endocrine therapy (HR+/HER2+)                            | 75 (9%)        |
| Only an unspecified targeted therapy / other targeted therapy | 4 (0.5%)       |
| Only chemotherapy                                             | 6 (1%)         |
| Chemotherapy + endocrine therapy                              | 4 (0.5%)       |
| Other/none                                                    | 52 (6%)        |

Abbreviations: GIST: Gastrointestinal stromal tumors; HER2: Human epidermal growth factor receptor 2; HR+: hormone receptor positive; N: Sample size; NCR: Netherlands cancer registry; TKIs: Tyrosine kinase inhibitors.

# Supplementary Figure 1. Changes in de novo metastatic cancer survival over time, per cancer type, 1-year and 5-year

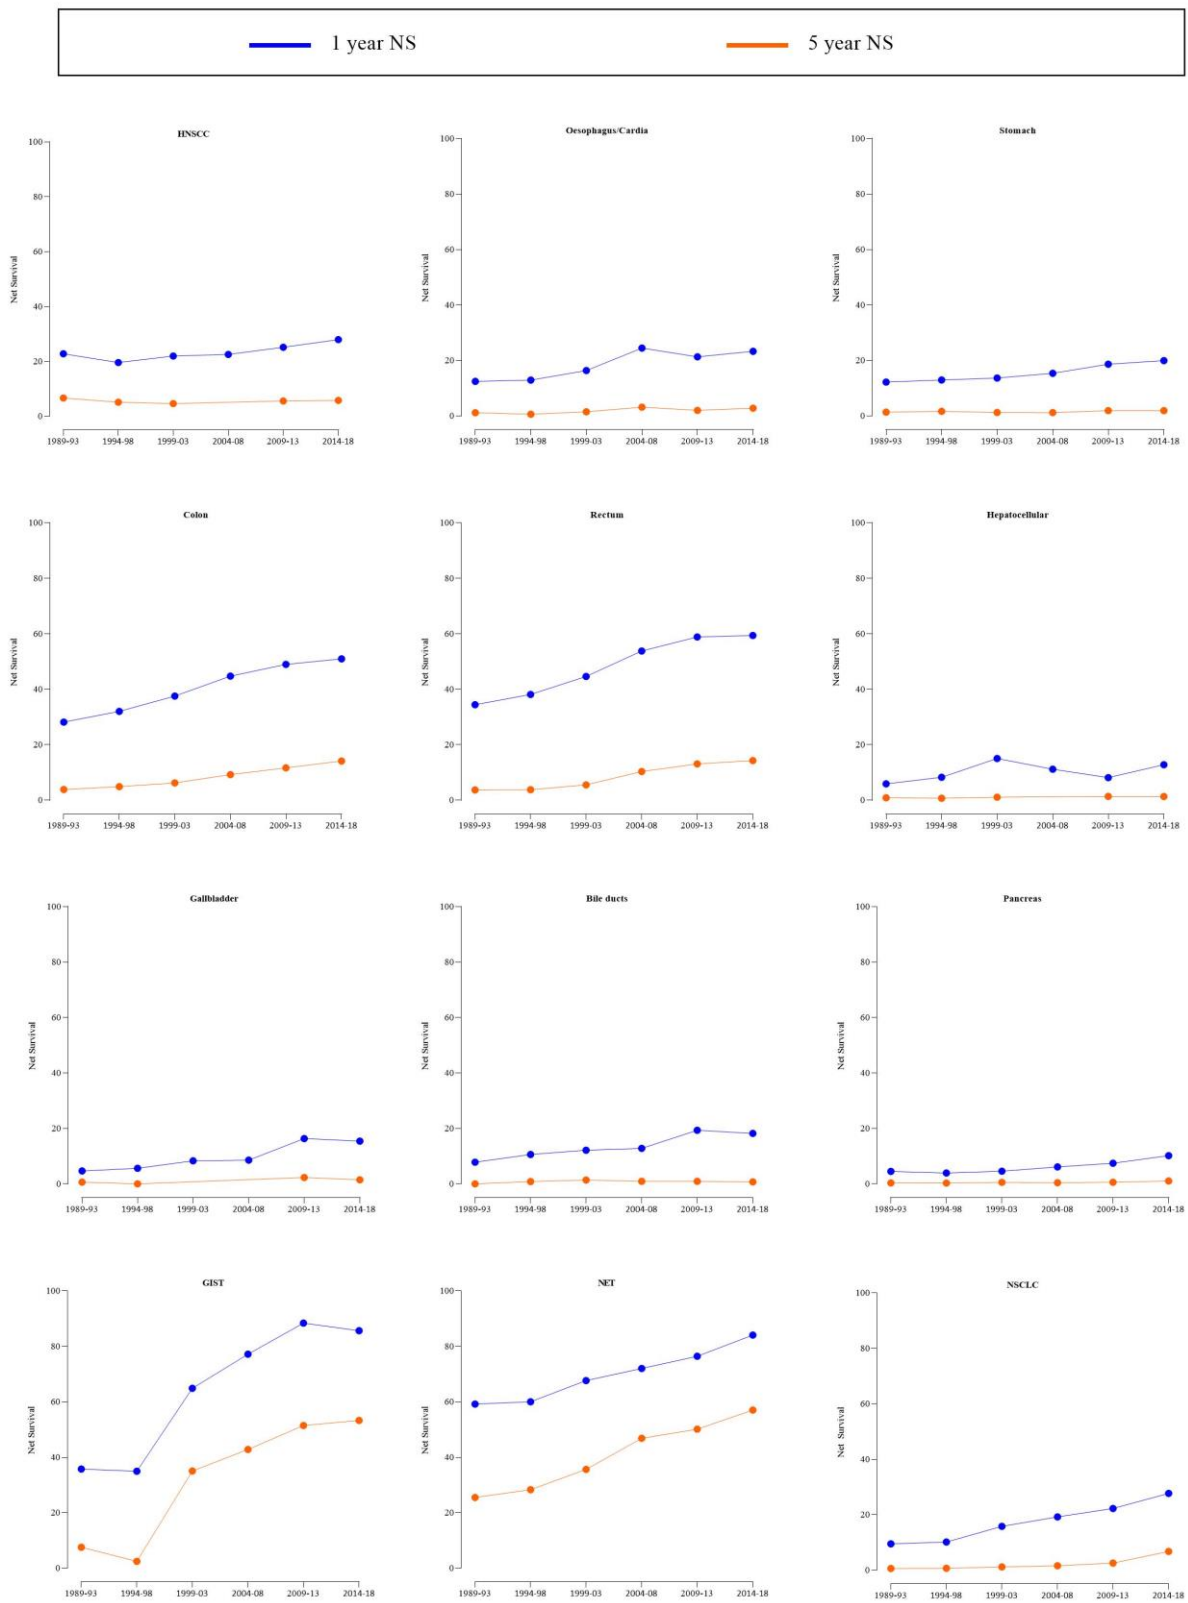

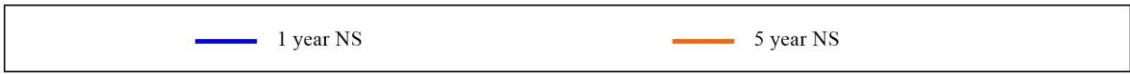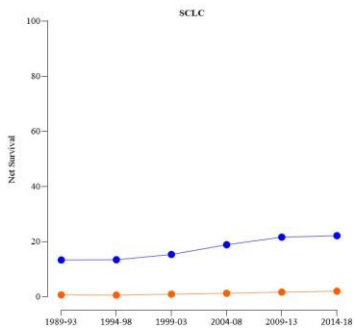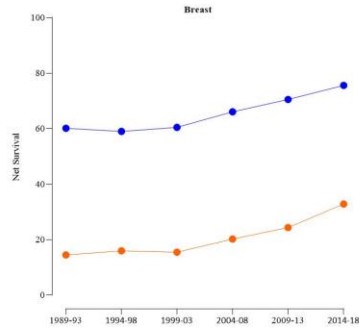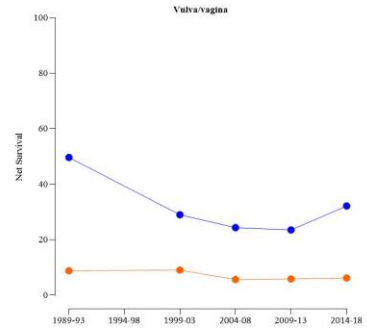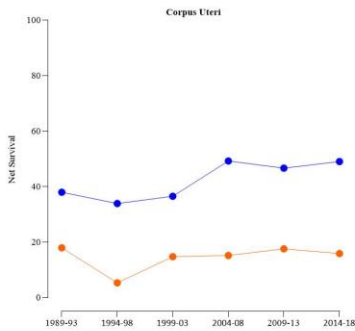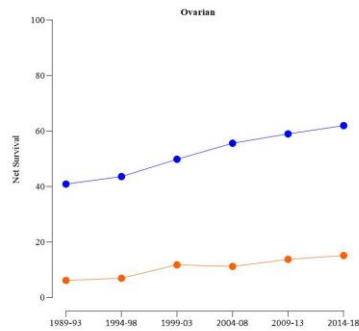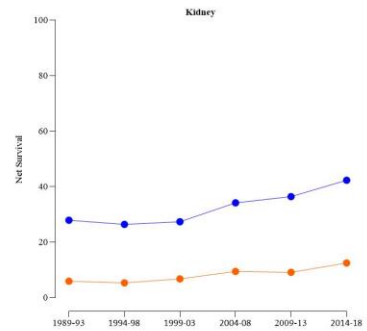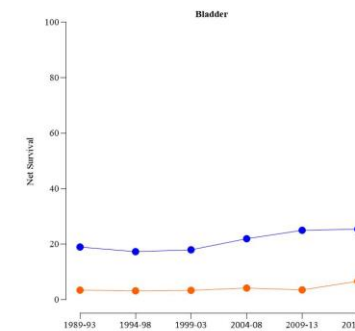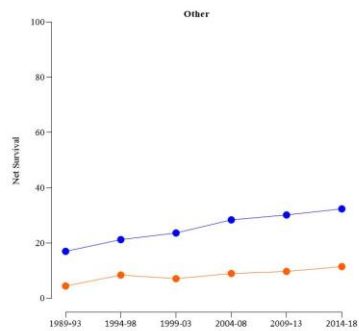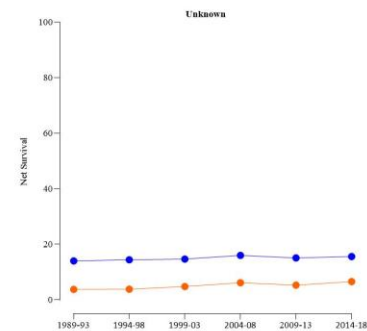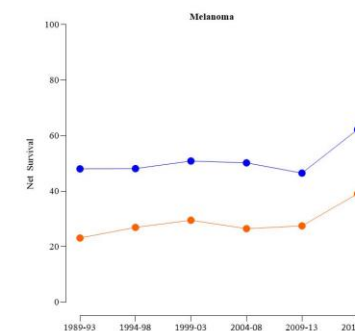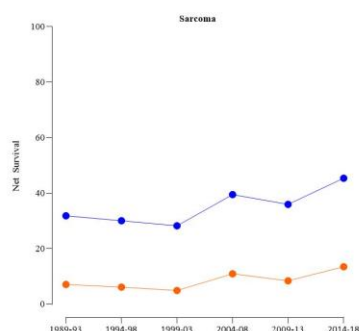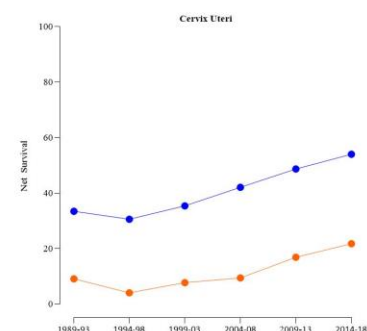



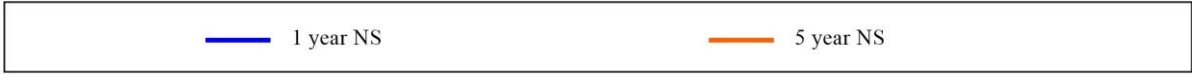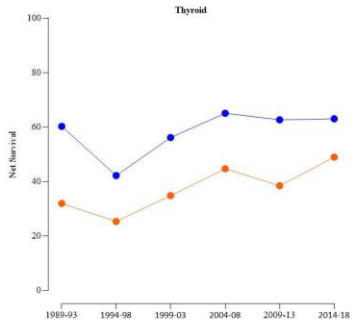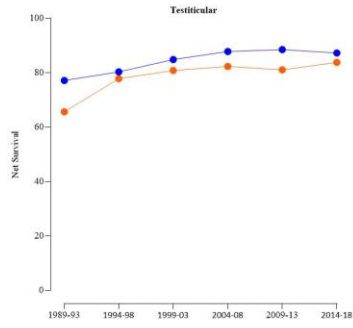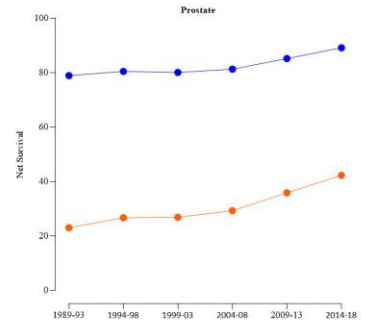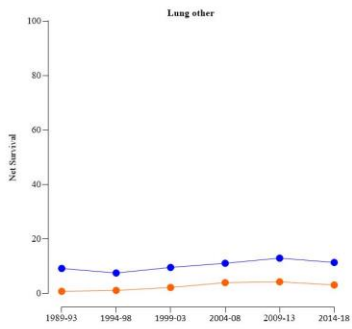

Abbreviations: HNSCC: head and neck squamous cell carcinoma; NET: Neuroendocrine Tumors; NS: Net survival; GIST: Gastrointestinal stromal tumors; SCLC: small cell lung cancer; NSCLC: non-small cell lung cancer.

## References

1. Corazziari I, Quinn M, Capocaccia R. Standard cancer patient population for age standardising survival ratios. *Eur J Cancer*. 2004;40(15):2307-16.
2. Netherlands Comprehensive Cancer Organization (IKNL). Figures about cancer. <https://www.cijfersoverkanker.nl/toelichting-berekening-overleving-35.html>. Accessed November 12, 2021.
3. Fritz A, Percy C, Jack A, eds. *International Classification of Diseases for Oncology (ICD-O), first revision of 3rd edn*. Geneva:World Health Organization;2013.
4. Brierley JD, Gospodarowicz MK, Wittekind C et al. eds. *TNM classification of malignant tumours. 8th ed.* Oxford, UK:Wiley Blackwell;2017.
5. Netherlands Comprehensive Cancer Organization (IKNL). Cancer adverse events [in Dutch: Bijwerkingen bij kanker]. <https://www.bijwerkingenbijkanker.nl/>. Accessed October 1, 2019.
6. Netherlands Association of Medical Oncologists (NVMO). Oncological medicines. <https://www.nvmo.org/bom-type/bom/?order=medicine>. Accessed October 1, 2020.
7. Pavel M, Valle JW, Eriksson B, et al. ENETS consensus guidelines for the standards of care in neuroendocrine neoplasms: systemic therapy-biotherapy and novel targeted agents. *Neuroendocrinology* 2017;105(3):266-80.
8. European commission (EC). Union Register of medicinal products for human use. [https://ec.europa.eu/health/documents/community-register/html/reg\\_hum\\_act.htm?sort=a](https://ec.europa.eu/health/documents/community-register/html/reg_hum_act.htm?sort=a). Accessed October 1, 2019.
9. Sun J, Wei Q, Zhou Y, Wang J, Liu Q, Xu H. A systematic analysis of FDA-approved anticancer drugs. *BMC Syst Biol*. 2017;11:1-17.
10. American Society of Oncology (ASCO). Cancer progress timeline. <https://www.asco.org/research-guidelines/cancer-progress-timeline>. Accessed October 31, 2019.
11. Quaadvlieg PFHJ, Visser O, Lamers CBHW, Janssen-Heijnen MLG, Taal BG. Epidemiology and survival in patients with carcinoid disease in the Netherlands. *Ann Oncol* 2001;12(9):1295-1300.
